# Increased efficacy of histone methyltransferase G9a inhibitors against MYCN-amplified Neuroblastoma

1 Jacob Bellamy<sup>1±</sup>, Marianna Szemes<sup>1±</sup>, Zsombor Melegh<sup>1,2</sup>, Anthony Dallosso<sup>2</sup>, Madhu  
2 Kollareddy<sup>1</sup>, Daniel Catchpoole<sup>3</sup> and Karim Malik<sup>1\*</sup>

3 <sup>±</sup>Joint first authors

4 <sup>1</sup>Cancer Epigenetics Laboratory, School of Cellular and Molecular Medicine, University  
5 of Bristol, Bristol, UK.

6 <sup>2</sup>Department of Cellular Pathology, Southmead Hospital, Bristol, UK

7 <sup>3</sup>The Kids Research Institute, The Children's Hospital at Westmead, Westmead, New  
8 South Wales 2145, Australia.

9 \* Correspondence: Corresponding Author [K.T.A.Malik@bristol.ac.uk](mailto:K.T.A.Malik@bristol.ac.uk)

10 **Keywords: G9a inhibitors, Neuroblastoma, MYCN, Apoptosis.**

## 11 **Abstract**

12 Targeted inhibition of proteins modulating epigenetic changes is an increasingly important priority in  
13 cancer therapeutics, and many small molecule inhibitors are currently being developed. In the case of  
14 neuroblastoma (NB), a paediatric solid tumour with a paucity of intragenic mutations, epigenetic  
15 deregulation may be especially important. In this study we validate the histone methyltransferase  
16 G9a/EHMT2 as being associated with indicators of poor prognosis in NB. Immunological analysis of  
17 G9a protein shows it to be more highly expressed in NB cell-lines with *MYCN* amplification, which  
18 is a primary determinant of dismal outcome in NB patients. Furthermore, G9a protein in primary  
19 tumours is expressed at higher levels in poorly differentiated/undifferentiated NB, and correlates with  
20 high EZH2 expression, a known co-operative oncoprotein in NB. Our functional analyses  
21 demonstrate that siRNA-mediated G9a depletion inhibits cell growth in all NB cell lines, but,  
22 strikingly, only triggers apoptosis in NB cells with *MYCN* amplification, suggesting a synthetic lethal

23 relationship between G9a and MYCN. This pattern of sensitivity is also evident when using small  
24 molecule inhibitors of G9a, UNC0638 and UNC0642. The increased efficacy of G9a inhibition in the  
25 presence of MYCN-overexpression is also demonstrated in the SHEP-21N isogenic model with tet-  
26 regulatable MYCN. Finally, using RNA sequencing, we identify several potential tumour suppressor  
27 genes that are reactivated by G9a inhibition in NB, including the *CLU*, *FLCN*, *AMHR2* and *AKR1C1*-  
28 3. Together, our study underlines the under-appreciated role of G9a in NB, especially in MYCN-  
29 amplified tumours.

30

### 31 **Introduction**

32 Neuroblastoma (NB) is a biologically and clinically heterogeneous cancer arising from the  
33 developing sympathetic nervous system. About 25% of NB patients have a very poor prognosis  
34 clinical subtype characterized by amplification of the *MYCN* proto-oncogene (Brodeur et al. 1984;  
35 Brodeur 2003; Maris et al. 2007). Change of function gene mutations are relatively scarce in NB, but  
36 include the oncogene *ALK*, which is frequently mutated in familial NB and in up to 10% of sporadic  
37 cases (Mossë et al. 2008). This has prompted the notion that epigenetic aberrations are likely to  
38 contribute to NB pathogenesis.

39 Consistent with this hypothesis, evidence has accrued for the involvement of epigenetic modifiers,  
40 including histone methyltransferases (HMTs) in NB tumorigenesis. For example, we previously  
41 showed that knockdown of the HMTs EZH2, CARM1 or PRMT5 all decreased survival of NB cells  
42 (Park et al. 2015). High levels of the MYCN transcription factor leads to activation of  
43 survival/growth genes, but also repression of genes necessary for terminal differentiation in the  
44 sympathetic nervous system (Westermarck et al. 2011; Gherardi et al. 2013). MYCN represses genes  
45 driving differentiation and apoptosis by a variety of means, including recruitment of epigenetic  
46 repressors, such as histone deacetylases (Iraci et al. 2011) and the Polycomb protein EZH2 (Corvetta  
47 et al. 2013). EZH2 has been independently shown to repress tumour suppressor genes in  
48 neuroblastoma, including *CASZI*, *RUNX3*, *NGFR* and *CLU* (Wang et al. 2012). *CLU*, encoding  
49 Clusterin, has been characterized as a haploinsufficient tumour suppressor gene in NB (Chayka et al.  
50 2009). The widespread involvement of HMTs in tumorigenesis has led to concerted pharmaceutical  
51 interest in developing selective inhibitors for HMTs (Helin and Dhanak 2013)

52 Another HMT implicated in NB is G9a (or EHMT2/KMT1C), the primary function of which is to  
53 mono- or di-methylate histone 3 lysine 9 (H3K9) (Tachibana et al. 2002; Shinkai and Tachibana

54 2011). These methylation marks are related to transcriptional activation and repression respectively,  
55 and G9a mediated gene silencing has been shown to be involved in regulating differentiation of  
56 embryonic stem cells (Wen et al. 2009). Moreover, G9a has multiple non-histone targets such as p53  
57 (Huang et al. 2010) and chromatin remodelers Reptin and Pontin (Lee et al. 2010; Lee et al. 2011). In  
58 these cases, the post-translational methylation of proteins can either inactivate protein function, as in  
59 the case of p53, or in the case of Reptin and Pontin can direct these proteins to different targets to  
60 alter target gene expression. G9a can also act as a co-factor independent of its HMT activity by  
61 binding to nuclear receptor coactivator GRIP1 and forming a scaffold complex which in turn can  
62 activate downstream targets (Lee et al. 2006). G9a is known to be overexpressed in a variety of  
63 cancers such as colorectal (Zhang et al. 2014), bladder (Cho et al. 2011) and hepatocellular (Kondo et  
64 al. 2007) carcinomas suggesting it is an oncoprotein and therefore a viable therapeutic target for  
65 small molecule inhibitors. The G9a inhibitor BIX-01294 was one of the first HMT inhibitors  
66 discovered, displaying over 20-fold greater inhibition of G9a compared to the closely related HMT  
67 GLP (EHMT1). This inhibitor also showed no activity against a panel of HMTs including PRMT1,  
68 SUV39H1, SET7/9 and ESET, and was able to reduce demethylated H3K9 (H3K9me2) levels in  
69 chromatin (Kubicek et al. 2007). A second generation inhibitor UNC0638 is a potent and highly  
70 selective probe for G9a and GLP (>500-fold selectivity over other histone methyltransferases) and a  
71 high toxicity/function ratio of >100 (Vedadi et al. 2011). UNC0642 has improved pharmacokinetic  
72 properties and is suitable for use *in vivo* (Liu et al. 2013). UNC0638 and UNC0642 act as  
73 competitive substrate inhibitors, thus blocking the SET domain from acquiring methyl groups from  
74 its S-adenosyl-methionine (SAM) cofactor.

75 Three previous studies have alluded to the possibility of G9a as a therapeutic target in NB. On the  
76 basis of microarray database analysis, Lu et al proposed that G9a may be oncogenic in NB, and  
77 further showed that G9a knockdown or BIX-01294 treatment led to apoptosis in three NB cell-lines  
78 (Lu et al. 2013). In contrast, two other studies suggested that G9a knockdown or BIX-01294  
79 treatment could trigger autophagic cell death (Ding et al. 2013; Ke et al. 2014, 2019), and that G9a-  
80 mediated epigenetic activation of serine-glycine metabolism genes is critical in oncogenesis. Taken  
81 together, these papers agree that inhibiting G9a may be beneficial for NB therapy, but the mode of  
82 action is unclear. In addition, the greatly more selective second generation of G9a inhibitors such as  
83 UNC0638 and UNC0642 have not been evaluated.

84 In this study, we comprehensively assess the association of G9a with key prognostic factors in NB,  
85 specifically differentiation status and MYCN over-expression. We further evaluate UNC0638 and  
86 UNC0642 as potential therapeutic agents for NB, and identify putative tumour suppressor genes that  
87 are repressed by G9a in NB. Our data strongly suggest that G9a inhibition may be especially  
88 beneficial for poor-prognosis NB driven by *MYCN* amplification.

89

## 90 **Materials and Methods**

### 91 **Neuroblastoma cell lines and culture conditions**

92 Neuroblastoma cell lines were kindly supplied by Prof. Deborah Tweddle (Newcastle University),  
93 Prof. Manfred Schwab (German Cancer Research Center), and Robert Ross (Fordham University),  
94 the Childrens Oncology Group (Texas Tech University Health Sciences Center) or purchased from  
95 Deutsche Sammlung von Mikroorganismen und Zellkulturen (DSMZ). Cell lines were cultured in  
96 Dulbecco's modified eagle's medium (DMEM):F12□HAM (Sigma) supplemented with 10% (v/v)  
97 foetal bovine serum (FBS) (Life technologies), 2mM L-glutamine, 100 U/mL penicillin, 0.1 mg/mL  
98 streptomycin, and 1% (v/v) non-essential amino acids. SH-EP□Tet21N cells were cultured in RPMI  
99 1640 (Gibco), supplemented with 10% (v/v) tetracycline-free FBS (Life technologies), 2 mM L-  
100 Glutamine, 100 U/mL penicillin, 0.1 mg/mL streptomycin, and 1µg/mL tetracycline. Cell counts and  
101 cell viability were assessed using Countess automated cell counter and trypan blue (Thermo Fisher  
102 Scientific). Transient knockdowns were performed by using short interfering RNA (siRNA),  
103 targeting *G9a/EHMT2* (5'-GAACAUCGAUCGCAACAUCdTdT-3'/5'-  
104 GAUGUUGCGAUCGAUGUUCdTdT-3') in a reverse transfection protocol, with 50 nM siRNA  
105 and Lipofectamine RNAiMAX (Invitrogen), both diluted in OptiMEM media (Invitrogen). Non-  
106 targeting siRNAs were used as control (5'-UGGUUUACAUGUUUCUGAdTdT-3'/5'-  
107 UCAGAAAACAUGUAAACCAAdTdT-3'). For G9a inhibition, attached cells were treated with BIX-  
108 01294 (Tocris), UNC0638, (Tocris) and UNC0642 (Tocris) dissolved in DMSO, at the indicated  
109 concentrations.

### 110 **MTT cell viability assay**

111 NB cells were seeded in 96 well plates and treated the next day in triplicate with a serial dilution of  
112 UNC0638/0642. After 72 hours, we added 10µL of MTT (5 mg/mL) (Sigma), followed by 50µL of  
113 SDS lysis buffer (10% SDS (w/v), 1/2500 (v/v) 37% HCl) after a further 3 hours. Following an  
114 overnight incubation at 37°C, the plates were read at 570 and 650 nm, using SpectraMax 190 plate  
115 reader (Molecular Devices).

### 116 **Protein Extraction and Western blot**

117 Floating and attached cells were lysed in Radioimmunoprecipitation assay (RIPA) buffer. Protein  
118 concentration was determined by using Micro BCA TM protein assay kit (Thermo Fisher).

119 Immunoblotting was performed as described previously (Park et al. 2015). The following antibodies  
120 were used to detect G9a (ab185050, Abcam), cPARP (ab32064, Abcam), MYCN (B8.48, Santa Cruz,  
121 SC-53993), cCaspase 3 (9664, Cell Signaling Technology), LC3B (L7543, Sigma), and  $\beta$ -Actin  
122 (A3854, Sigma), according to manufacturer's instructions.

### 123 **RNA extraction, reverse transcription and qPCR**

124 RNA was extracted from attached cells by using RNeasy Plus or miRNeasy kits (QIAGEN)  
125 according to manufacturer's instructions and subsequently transcribed into cDNA with Superscript  
126 IV (Invitrogen). Quantitative PCR was performed by using QuantiNova kit on Mx3500P PCR  
127 machine (Stratagene). The following oligonucleotide primers were used to detect target gene  
128 expression: *AMHR2* F- TACTCAACCACAAGGCCAG, R-GGTCTGCATCCCAACAGTCT,  
129 *FLCN* F- TCTCTCAGGCTGTGGGAGC R-CCAGCATGCGGAAAGAAG, *AKRIC1* F-  
130 CCTAAAAGTAAAGCTTTAGAGGCCACC, R-  
131 GAAAATGAATAAGGTAGAGGTCAACATAAT, *AKRIC2*, F-  
132 CCTAAAAGTAAAGCTCTAGAGGCCGT, R- GAAAATGAATAAGATAGAGGTCAACATAG,  
133 *AKRIC3* F- CTGATTGCCCTGCGCTAC, R- TCCTCTGCAGTCAACTGGAAC, *CLU* F-  
134 AGCAGCTGAACGAGCAGTTT, R- AGCTTCACGACCACCTCAGT, *TBP* F-  
135 AGCCACGAACCACGGCACTGAT, R- TACATGAGAGCCATTACGTCGT, *ALK* F-  
136 CGACCATCATGACCGACTACAA, R- CCCGAATGAGGGTGATGTTTT.

### 137 **Cell cycle analysis**

138 Propidium-iodide labelling and fluorescence activated cell sorting analysis to detect cell cycle phases  
139 was performed as previously described (Park et al. 2015).

### 140 **Immunohistochemistry**

141 Tissue microarrays (TMAs), containing 50 peripheral neuroblastic tumours were stained using  
142 antibodies for EZH2 (NCL-L-EZH2, Novocastra) and G9a/EHMT2 (EPR4019(2), Abcam).  
143 Immunohistochemistry was independently scored by two pathologists blinded to the specimens, and  
144 a score of 1-4 was assigned based on proportion of positive cells (0, no staining; 1, sporadic staining  
145 of individual cells; 2, <20% of cells stained; 3, 20% to 50% of cells stained; 4, >50% of cells  
146 stained). All human tissues were acquired with appropriate local research ethics committee approval.

147 Immunohistochemistry was performed with a Leica Microsystem Bond III automated machine using  
148 the Bond Polymer Refine Detection Kit (Ref DS9800) followed by Bond Dab Enhancer (AR9432).  
149 The slides were dewaxed with Bond Dewax Solution (AR9222). Heat mediated antigen retrieval was  
150 performed using Bond Epitope Retrieval Solution for 20 mins.

### 151 **RNA-seq and bioinformatic analysis**

152 LAN-1 cells were treated with 3 $\mu$ M BIX-01294 and DMSO vehicle as control for 72 hours and were  
153 subsequently harvested. RNA was extracted by using miRNeasy Mini Kit (Qiagen), according to  
154 manufacturer's instructions. Libraries were constructed and sequenced as previously described  
155 (Szemes et al. 2018). Briefly, cDNA libraries were prepared from 1 ug RNA (TruSeq Stranded Total  
156 RNA Library Prep Kit, Illumina) and 100 bp, paired end reads were sequenced on Illumina HiSeq  
157 2000. The reads were aligned to the human genome (hg38) by using TopHat2 (v2.0.14) and the  
158 alignment files (BAM) files were further analysed in SeqMonk v1.45.  
159 (<https://www.bioinformatics.babraham.ac.uk/projects/seqmonk/>). Gene expression was quantified by  
160 using the Seqmonk RNA-seq analysis pipeline. Differentially expressed genes (DEG) were identified  
161 by DESEQ2 (p<0.005). sets, and a minimum fold difference threshold of 1.3 was applied. RNA  
162 sequencing data is available from the European Nucleotide Archive (ENA) under the study accession  
163 number PRJEB35417. We performed Gene Signature Enrichment Analysis (GSEA) on a preranked  
164 list of log<sub>2</sub>-transformed relative gene expression values (Broad Institute). Kaplan Meier survival  
165 analysis, indicating the prognostic value of the expression of genes or metagenes was performed by  
166 using the Kaplan scan tool in R2 Genomics Analysis and Visualization Platform (<http://r2.amc.nl>).

167

## 168 **Results**

### 169 **G9a expression correlates with poor prognosis and MYCN amplification in NB**

170 We first assessed the expression of *G9a/EHMT2* in an RNA-seq dataset of 498 primary NBs (the  
171 SEQC dataset, GSE62564) (Su et al. 2014) using the R2: Genomics Analysis and Visualization  
172 Platform (<http://r2.amc.nl>). Kaplan-Meier analysis of overall survival showed that high *G9a/EHMT2*  
173 expression was significantly associated with poor survival, (Figure 1A). Moreover, *G9a/EHMT2* has  
174 a significantly increased expression in MYCN-amplified (MNA) NBs (Figure 1B). In order to assess  
175 whether this relationship at the RNA level was also apparent at the protein level, we conducted  
176 immunoblotting of G9a protein expression in NB cell lines with and without MNA, and confirmed  
177 that increased G9a protein expression was apparent in MNA NB cell lines (Figure 1C-D). We next  
178 examined G9a protein expression in a tissue microarray of 50 primary neuroblastic tumours, in  
179 parallel with EZH2, which is known to be involved in NB. Strikingly, expression of G9a and EZH2  
180 was barely detectable in the more differentiated ganglioneuromas and ganglioneuroblastomas,  
181 generally regarded as low risk tumours (Figure 2A-B). However, high nuclear expression of both  
182 G9a and EZH2 was observed in the poorly differentiated and undifferentiated tumours, which are  
183 commonly associated with higher risk and poor outcome (Figure 2 D). Accordingly, G9a  
184 immunopositivity strongly correlated with the differentiation status of neuroblastic tumours (Figure  
185 2E). The few G9a positive cells in the more differentiated tumours were all undifferentiated  
186 neuroblasts, underlining the link between differentiation status and G9a expression. Scoring the  
187 tumours for G9a and EZH2 expression according to the percentage of immunopositive cells revealed  
188 that G9a and EZH2 scores were very highly correlated ( $R=0.76$ ,  $p=1.45e-10$ , Figure 2F), indicative  
189 of a potential functional interplay between these HMTs. Unfortunately, MYCN status was available  
190 for only a few tissue microarray samples, therefore not sufficient for statistical analysis.  
191 Nevertheless, our expression analyses at the RNA and protein levels shows that G9a over-expression  
192 is associated with poor prognosis NB and MYCN/EZH2 status.

### 193 **Short interfering RNA mediated G9a depletion leads to apoptotic cell death in MNA** 194 **neuroblastoma cells**

195 As there is increased expression of G9a in MNA neuroblastoma cell lines, we next evaluated the  
196 effect of short interfering RNA (siRNA) mediated G9a depletion on three MNA cell lines and three  
197 non-MNA cell lines. Quantification of adherent and floating cells following knockdown of G9a in



198 MNA Kelly, LAN-1, and SK-N-BE(2)C showed a consistent increase in the percentage of dead cells  
199 ( $p < 0.05$ ) and decrease in the number of live cells in the population (Figure 3A). In order to assess the  
200 mode of reduced cell survival, immunoblotting was carried out with markers for apoptosis (cleaved  
201 PARP and cleaved caspase 3) and autophagy (LC3B). In all three MNA lines, apoptotic cell death  
202 was verified by the increase in apoptosis markers (Figure 3A, lower panel). In contrast, no increases  
203 in LC3B were apparent, suggesting little or no effect on autophagy. Knockdown in the presence of  
204 QVD, a caspase inhibitor, led to decreased floating cells after G9a knockdown, and, as expected, no  
205 apoptotic markers (Supplementary Figure 1A-B). MYCN protein also decreased considerably after  
206 G9a knockdown in all three MNA lines. Cell cycle analysis of Kelly cells after G9a knockdown  
207 demonstrated a significant increase of cells in G1 and a decrease of cells entering S-phase  
208 (Supplementary Figure 1C).

209 In contrast to these effects in MNA cell-lines, G9a depletion-associated cell death was not seen in the  
210 three non-MNA cell lines tested (SH-EP, GI-ME-N, and SK-N-AS), as there was no significant  
211 increase in the percentage of dead cells seen following the depletion. Despite this, decreased  
212 proliferation of these lines was indicated by a significant decrease in the number of live cells (Figure  
213 3B). The observed lack of cell death was confirmed by immunoblots showing no change in apoptotic  
214 markers cleaved PARP and caspase 3 (Figure 3B). Variable effects on LC3B were observed,  
215 increasing after knockdown in SH-EP cells and decreasing in GI-ME-N and SK-N-AS cell-lines.  
216 Taken together, our analysis of NB cell lines strongly suggests a requirement on G9a for cell survival  
217 of MNA NB.

218 To confirm the G9a dependency of MYCN over-expressing NB cells, G9a depletion was evaluated in  
219 isogenic SH-EP  $\square$  Tet21N (S21N) cells with Tet-inducible MYCN expression. With MYCN induced,  
220 G9a depletion led to a significant increase in the percentage of dead cells, whereas there was no  
221 change in cells without MYCN induction (Figure 4A). As before, this was despite a significant  
222 decrease in live cell count that occurred across both induced and non-induced MYCN S21N cells  
223 (Figure 4A). This was further confirmed by the immunoblots showing that G9a depletion led to an  
224 increase in apoptosis markers in the MYCN induced cells only (Figure 4B). These experiments  
225 further emphasise the G9a dependency of MYCN-overexpressing NB cells.

226 **MNA NB cell are more sensitive to G9a inhibitors UNC0638 and UNC0642**

227 As our genetic interference analyses demonstrate that NB cells may be vulnerable to decreased G9a  
228 activity, we treated a panel of 13 NB cell lines and 2 two disease-free control cell lines with G9a  
229 SMIs and conducted cell survival assays. Whilst all NB cell lines exhibited reduced viability upon  
230 treatment with UNC0638 (Figure 5A) and UNC0642 (Figure 5B) in a concentration dependent  
231 manner, there was no effect on the disease-free lines RPE-1 and NF-TERT. Importantly, consistent  
232 with our genetic interference data, a clear pattern of greater sensitivity of MNA lines was observed.  
233 For UNC0638, the average  $IC_{50}$  was  $8.3\mu\text{M}$  for MNA lines, compared to  $19\mu\text{M}$  for non-MNA lines  
234 ( $p<0.01$ ). Similarly, for UNC0642 the average  $IC_{50}$ s were  $15\mu\text{M}$  and  $32\mu\text{M}$  for MNA and non-MNA  
235 lines respectively (Figure 5C-F).

236 Next, UNC0638 and UNC0642 were evaluated in S21N cells to further assess the association of  
237 MYCN over-expression and sensitivity to pharmaceutical G9a inhibition. S21N cells with induced  
238 (high) MYCN were more sensitive to G9ai by UNC0638 and UNC0642 than the uninduced cells  
239 (Figure 5G-H). As with the cell-line panel, UNC0638 was slightly more potent than UNC0642, with  
240 the  $IC_{50}$  values for MYCN induced cells being  $5.7\mu\text{M}$  and  $10.6\mu\text{M}$  respectively, compared to  $16.6\mu\text{M}$   
241 and  $23.2\mu\text{M}$  for uninduced S21N cells (Figure 5I). All the  $IC_{50}$  values for the cell-lines analysed are  
242 detailed in Table 1. Thus, our pharmaceutical inhibition assays reflect our genetic interference data,  
243 showing that NB cell-lines are sensitive to both UNC0638 and UNC0642, with MYCN over-  
244 expressing cells being significantly more sensitive than non-MNA lines.

#### 245 **UNC0638 leads to increased apoptosis specifically in MNA NB lines**

246 G9a knockdown analyses demonstrated that only MNA NB lines underwent programmed cell death,  
247 despite all lines showing some degree of growth inhibition. To determine if the effects on cell death  
248 and proliferation following G9a drug inhibition are akin to the results following G9a depletion as  
249 shown in Figure 3, three MNA and three non-MNA NB cell lines were treated with UNC0638 and  
250 cell growth effects quantified, together with an assessment of apoptosis and autophagy markers. The  
251 three most sensitive three MNA lines, Kelly, IMR-32 and LAN-1 all showed a significant increase in  
252 the percentage of dead cells following treatment (Figure 6A). Apoptosis was verified by  
253 immunoblotting, all 3 treated lines showing an increase in cleaved PARP and caspase 3 (Figure 6A,  
254 lower panel). Although Kelly and LAN-1 cells showed some increase in LC3B, IMR-32 cells  
255 exhibited a decrease of LC3B. As with knockdowns, all 3 MNA lines showed a decrease in MYCN  
256 protein.

257 Conversely, in the three non-MNA lines, SH-EP, GI-M-EN, and SH-SY5Y, there was no significant  
258 change in the percentage dead cells. However, there was a significant decrease in the number of live  
259 cells counted following the treatments (Figure 6B). There was no change in the apoptotic markers  
260 after UNC0638 treatment; however, there was an increase in the autophagy marker LC3B in all three  
261 non-MNA cell-lines. Together these experiments mirror the G9a depletion experiments with respect  
262 to increased apoptosis and efficacy in MNA cell-lines.

263 Using the S21N model, we further evaluated the requirement for MYCN over-expression in  
264 apoptosis triggered by UNC0638. Although there was no increase in the percentage of dead cells  
265 without MYCN induction, a significant 2-fold increase in dead cells was apparent in the presence of  
266 MYCN induction (Figure 7A). Immunoblotting showed that the autophagy marker LC3B was  
267 increased following UNC0638 treatment regardless of MYCN levels. The apoptosis markers,  
268 however, were only increased by UNC0638 in the presence of MYCN over-expression, further  
269 confirming the requirement for G9a activity for the survival of MYCN over-expressing cells (Figure  
270 7B). This further supports G9a activity for targeted therapeutics in NB, especially for patients with  
271 MYCN amplification.

## 272 **Identification of genes regulated by G9a inhibition in NB**

273 We next sought insight into gene expression changes in MNA NB cells following G9a inhibition. For  
274 this, we treated LAN-1 cells with BIX-01294, as this inhibitor would facilitate comparison with  
275 previous studies on G9a in NB, including one attributing drug activity to changes in the expression of  
276 genes involved in serine metabolism. Using RNA sequencing, we identified 115 genes whose  
277 expression level was altered by more than 1.3-fold, at  $p < 0.005$ . Consistent with the role of G9a in  
278 epigenetic repression, the majority of these genes were upregulated after BIX-01294 treatment, but  
279 approximately a third of affected genes were down-regulated (Figure 8A). The magnitude of gene  
280 induction was generally much higher than the changes in down-regulated genes, with 11 genes being  
281 upregulated between 10-100-fold more than vehicle treated cells. In contrast, down-regulated genes  
282 were decreased by a maximum of approximately 5-fold. We have not detected changes in the genes  
283 of the serine-glycine pathway as previously described (Ding et al. 2013) which may be due to  
284 differences in culture conditions, namely supplementation with non-essential amino acids. A full list  
285 of genes showing altered expression is given in Supplementary Table 2. Gene set enrichment analysis  
286 (GSEA) verified a profound effect on gene sets driven by the MYC family; in particular the MYCN-  
287 157 signature of genes associated with poor prognosis in NB (Valentijn et al. 2012) was profoundly

288 affected. MYCN induced genes from this data set were downregulated by BIX-01294, whereas  
289 MYCN repressed genes were upregulated (Figure 8B). GSEA also showed that apoptosis gene sets  
290 were upregulated, together with gene sets including genes epigenetically silenced by EZH2 and  
291 histone deacetylases 1 and 3 (HDAC1 and HDAC3) (Figure 8C-D). These analyses suggest that G9a  
292 inhibition may be effective in altering oncogenic gene expression programmes in MNA NB.

293 In order to further assess the alteration of oncogenic potential by G9a inhibition, we constructed  
294 metagenes corresponding to BIX-01294 upregulated and downregulated genes. These metagenes act  
295 as quantifiable model genes enabling the association with prognosis of grouped up/down regulated  
296 genes. As shown in Figure 8E, high expression of BIX-01294 upregulated genes correlate with good  
297 overall outcome, and low expression of these genes correlates with poor prognosis. Conversely, high  
298 expression of BIX-01294 down-regulated genes correlates with poor overall outcome, and low  
299 expression of these genes correlates with good prognosis. This strongly suggests that G9a represses  
300 tumour suppressor genes in NB that can be reactivated by BIX-01294 treatment. The data also  
301 suggests that G9a supports activation of genes associated with NB development, including MYCN  
302 regulated genes.

303 Lastly, we validated some of the top genes identified after BIX-01294 treatment of LAN-1 cells in  
304 two MNA (LAN-1 and Kelly) and two non-MNA NB (GI-M-EN and SK-N-AS) cell-lines treated  
305 with UNC0638. As shown in Figure 8F, *CLU*, *AMHR2*, *FLCN*, and *AKR1C1-3* were all upregulated  
306 to varying extents following UNC0638 treatment, confirming good concordance between the actions  
307 of BIX-01294 and UNC0638. We also confirmed down-regulation of the *ALK* oncogene, revealed by  
308 our RNA sequencing, with UNC0638. The association between expression of individual genes and  
309 clinical prognosis is summarized in Supplementary Table 2, strongly suggesting that our BIX-  
310 01294/UNC0638 validated genes, *AMHR2*, *FLCN*, and *AKR1C1-3* are amongst many novel NB  
311 tumour suppressor genes found by our analysis. *CLU*, encoding clusterin, is already a known NB  
312 tumour suppressor gene (Chayka et al. 2009) known to be repressed by MYCN and EZH2 (Valentijn  
313 et al. 2012; Wang et al. 2012).

314 Taken together, our data strongly support small molecule inhibition of G9a as a therapeutic  
315 intervention for NB, in particular the MYCN-amplified subgroup.

316 **Discussion**

317 Whilst the potential of targeting the epigenetic machinery for cancer therapy is increasingly  
318 recognised (Pfister and Ashworth 2017), and over-expression of G9a has been reported in many  
319 cancers (Casciello et al. 2015), targeted inhibition of G9a is relatively understudied. In the context of  
320 neuroblastoma, three papers have examined the impact of G9a knockdown and the small molecule  
321 inhibitor BIX-01294 on cell proliferation and cell death (Ke et al. 2014; Lu et al. 2013; Ding et al.  
322 2013). However, the effect and potential benefits of targeting G9a in NB remain unclear due to  
323 limited analysis of the G9a protein in NB, activities and pathways regulated by G9a, and the absence  
324 of assessment of second-generation inhibitors of G9a towards NB cells. In this study, we have  
325 examined G9a expression in relation to NB disease stratifying factors, and also assessed three G9a  
326 inhibitors. Based on our findings, as discussed below, we propose that pharmaceutical inhibition of  
327 G9a is a viable therapeutic approach, especially for NB driven by MYCN amplification.

328 Our immunohistochemical analysis of G9a in NB shows for the first time that nuclear G9a is  
329 markedly increased in poorly differentiated and undifferentiated NB, as also suggested by our mRNA  
330 database mining and immunoblotting of thirteen NB cell-lines. Two other potentially critical  
331 associations were revealed by these studies, (i) elevated G9a in MNA cell-lines, and (ii) correlated  
332 expression between EZH2 and G9a in primary tumours. Interestingly, G9a has been shown to  
333 stabilise c-Myc in immune cells and thereby contribute to the regulation of inflammation (Liu et al.  
334 2014). More recently, this association was also reported in breast cancer cell lines, with the Myc-G9a  
335 complex being crucial for Myc-mediated gene repression (Tu et al. 2018). Thus, it is possible that  
336 G9a may regulate MYCN in an analogous manner by modulating MYCNs transcriptional activity.  
337 G9a may also act similarly to PRMT5, which we have shown to directly methylate MYCN and  
338 regulate its stability at the protein level (Park et al. 2015). The need for further in-depth analyses to  
339 explore the possible interplay of G9a and MYCN proteins is underlined by our expression data, as  
340 well as functional and transcriptomic data (see below).

341 The correlation of G9a and EZH2 expression is also important when considering possible epigenetic  
342 therapeutics for NB. Although G9a is mainly known to catalyse H3K9 dimethylation, it can also  
343 methylate H3K27 (Tachibana et al. 2001) and it has been shown to be a key regulator of Polycomb  
344 repressor Complex 2 (Mozzetta et al. 2014). In addition, it was shown in breast cancer cells that  
345 effective gene re-expression necessitated the inhibition of both G9a and EZH2. For example, dual  
346 depletion of G9a and EZH2 dramatically increased *SPINK1* mRNA when individual depletion had no  
347 effect. This dual inhibition was also shown to increase growth inhibition over only G9a or EZH2

348 single inhibition (Curry et al. 2015). Given the increasing evidence for EZH2 involvement in NB,  
349 especially in tandem with MYCN (Li et al. 2018; Chen et al. 2018; Corvetta et al. 2013; Wang et al.  
350 2012), there is clearly a rationale for deploying G9a and EZH2 inhibitors together for the treatment of  
351 NB. This is further emphasized by the reactivation of the *CLU* gene by all the G9a inhibitors shown  
352 in our studies, as it is a NB tumour suppressor gene known to be regulated by EZH2 and MYCN  
353 (Chayka et al. 2009; Valentijn et al. 2012; Wang et al. 2012).

354 Our evaluation of UNC0638 and UNC0642 showed that both inhibitors have a more pronounced  
355 growth-inhibitory effect on MNA NB cell-lines. Furthermore, functional analysis of genetic and  
356 pharmaceutical inhibition of G9a revealed a striking correlation between MYCN over-expression and  
357 apoptosis triggered by G9a inhibition. This clarifies to some extent the previous contradictions  
358 regarding autophagy and apoptosis resulting from G9a inhibition in NB (Ke et al. 2014; Lu et al.  
359 2013; Ding et al. 2013). More importantly, it alludes to a synthetic lethal relationship (Kaelin Jr  
360 2005) between G9a and MYCN expression in MNA NB. Whilst the mechanisms underlying this  
361 remain to be fully elucidated, our RNA sequencing suggests that a simultaneous combination of  
362 effects on MYCN control of gene expression and epigenetic derepression are strongly involved. G9a  
363 is also known to be involved in the DNA damage response, with UNC0638 potentiating the  
364 cytotoxicity of DNA damaging agents (Agarwal and Jackson 2016). It is therefore possible that cells  
365 over-expressing MYCN have greater replicative stress and are therefore more susceptible to an  
366 impairment/inhibition of the DNA damage response. Although G9a is also known to regulate the p53  
367 protein by post-translational methylation (Huang et al. 2010), our data showing that the *TP53* wild-  
368 type cell line IMR-32 shows comparable sensitivity to other MNA cell-lines (containing *TP53*  
369 mutations) suggests that the p53 pathway is not directly involved in growth inhibition induced by the  
370 G9a inhibitors.

371 Our RNA sequencing following BIX-01294 treatment revealed upregulation of the established NB  
372 tumour suppressors *CLU*, but also other putative tumour suppressors not previously associated with  
373 NB. One example of this is the *FLCN* gene, encoding folliculin. Folliculin has been shown to  
374 regulate AMP-activated kinase (AMPK), which enables regulation of cancer cell metabolism and  
375 also autophagy (Possik et al. 2014; Yan et al. 2014). Notably, our upregulated genes also included  
376 *FNIP1* and *FNIP2*, encoding folliculin-interacting proteins 1 and 2, emphasising the potential  
377 importance of this pathway in NB tumour suppression. Other putative tumour suppressor genes  
378 include *AMHR2*, encoding Anti-Mullerian Hormone Receptor Type 2, also known as Mullerian

379 Inhibiting Substance Type II Receptor. *AMHR2* has been shown to suppress tumorigenicity in the  
380 testes (Tanwar et al. 2012). The aldo keto-reductase 1 family genes (*AKR1C1-3*) encode  
381 steroidogenic genes which, although expressed at high levels in some cancers (Zeng et al. 2017), are  
382 also downregulated in others such as breast and gastric cancers (Frycz et al. 2016; Wenners et al.  
383 2016). Of the down-regulated genes, several were histone genes, probably reflecting the decreased  
384 G1 to S-phase progression in cells treated with inhibitors. The *ALK* gene was also decreased,  
385 possibly as a result of decreased *MYCN*; *ALK* and *MYCN* are known to mutually regulate each  
386 other in NB (Hasan et al. 2013; Schonherr et al. 2012). Whilst our study does not establish a direct  
387 causal link between G9a, *MYCN* and *ALK*, it is interesting to note that the two cell-lines most  
388 sensitive to UNC0638 are representative of “ultra-high risk” NB, having both *MYCN* amplification  
389 and activating mutations of *ALK*.

390 In summary, this paper highlights a previously unrecognised therapeutic vulnerability of  
391 neuroblastomas with *MYCN* amplification to small molecule inhibitors of G9a, As *MYCN* is also a  
392 known driver of several other cancers, this work underlines the need for future work on these cancers  
393 with current inhibitors, and the development of next generation G9a inhibitors.

394

## 395 REFERENCES

- 396 Agarwal, P., and S. P. Jackson. 2016. 'G9a inhibition potentiates the anti-tumour activity of DNA  
397 double-strand break inducing agents by impairing DNA repair independent of p53 status',  
398 *Cancer Lett*, 380: 467-75.
- 399 Brodeur, G. M. 2003. 'Neuroblastoma: biological insights into a clinical enigma', *Nat Rev Cancer*, 3:  
400 203-16.
- 401 Brodeur, G. M., R. C. Seeger, M. Schwab, H. E. Varmus, and J. M. Bishop. 1984. 'Amplification of  
402 N-myc in untreated human neuroblastomas correlates with advanced disease stage', *Science*,  
403 224: 1121.
- 404 Casciello, F., K. Windloch, F. Gannon, and J. S. Lee. 2015. 'Functional Role of G9a Histone  
405 Methyltransferase in Cancer', *Front Immunol*, 6: 487.
- 406 Chayka, O., D. Corvetta, M. Dews, A. E. Caccamo, I. Piotrowska, G. Santilli, S. Gibson, N. J. Sebire,  
407 N. Himoudi, M. D. Hogarty, J. Anderson, S. Bettuzzi, A. Thomas-Tikhonenko, and A. Sala.  
408 2009. 'Clusterin, a haploinsufficient tumor suppressor gene in neuroblastomas', *J Natl Cancer*  
409 *Inst*, 101: 663-77.
- 410 Chen, L., G. Alexe, N. V. Dharia, L. Ross, A. B. Iniguez, A. S. Conway, E. J. Wang, V. Veschi, N.  
411 Lam, J. Qi, W. C. Gustafson, N. Nasholm, F. Vazquez, B. A. Weir, G. S. Cowley, L. D. Ali,  
412 S. Pantel, G. Jiang, W. F. Harrington, Y. Lee, A. Goodale, R. Lubonja, J. M. Krill-Burger, R.

- 413 M. Meyers, A. Tsherniak, D. E. Root, J. E. Bradner, T. R. Golub, C. W. Roberts, W. C. Hahn,  
414 W. A. Weiss, C. J. Thiele, and K. Stegmaier. 2018. 'CRISPR-Cas9 screen reveals a MYCN-  
415 amplified neuroblastoma dependency on EZH2', *J Clin Invest*, 128: 446-62.
- 416 Cho, Hyun-Soo, John D. Kelly, Shinya Hayami, Gouji Toyokawa, Masahi Takawa, Masanori  
417 Yoshimatsu, Tatsuhiko Tsunoda, Helen I. Field, David E. Neal, Bruce A. J. Ponder, Yusuke  
418 Nakamura, and Ryuji Hamamoto. 2011. 'Enhanced Expression of EHMT2 Is Involved in the  
419 Proliferation of Cancer Cells through Negative Regulation of SIAH1', *Neoplasia*, 13: 676-  
420 IN10.
- 421 Corvetta, D., O. Chayka, S. Gherardi, C. W. D'Acunto, S. Cantilena, E. Valli, I. Piotrowska, G.  
422 Perini, and A. Sala. 2013. 'Physical interaction between MYCN oncogene and polycomb  
423 repressive complex 2 (PRC2) in neuroblastoma: functional and therapeutic implications', *J*  
424 *Biol Chem*, 288: 8332-41.
- 425 Curry, E., I. Green, N. Chapman-Rothe, E. Shamsaei, S. Kandil, F. L. Cherblanc, L. Payne, E. Bell,  
426 T. Ganesh, N. Srimongkolpithak, J. Caron, F. Li, A. G. Uren, J. P. Snyder, M. Vedadi, M. J.  
427 Fuchter, and R. Brown. 2015. 'Dual EZH2 and EHMT2 histone methyltransferase inhibition  
428 increases biological efficacy in breast cancer cells', *Clin Epigenetics*, 7: 84.
- 429 Ding, J., T. Li, X. Wang, E. Zhao, J. H. Choi, L. Yang, Y. Zha, Z. Dong, S. Huang, J. M. Asara, H.  
430 Cui, and H. F. Ding. 2013. 'The histone H3 methyltransferase G9A epigenetically activates  
431 the serine-glycine synthesis pathway to sustain cancer cell survival and proliferation', *Cell*  
432 *Metab*, 18: 896-907.
- 433 Frycz, B. A., D. Murawa, M. Borejsza-Wysocki, M. Wichtowski, A. Spychala, R. Marciniak, P.  
434 Murawa, M. Drews, and P. P. Jagodzinski. 2016. 'Transcript level of AKR1C3 is down-  
435 regulated in gastric cancer', *Biochem Cell Biol*, 94: 138-46.
- 436 Gherardi, S., E. Valli, D. Erriquez, and G. Perini. 2013. 'MYCN-mediated transcriptional repression  
437 in neuroblastoma: the other side of the coin', *Front Oncol*, 3: 42.
- 438 Hasan, M. K., A. Nafady, A. Takatori, S. Kishida, M. Ohira, Y. Suenaga, S. Hossain, J. Akter, A.  
439 Ogura, Y. Nakamura, K. Kadomatsu, and A. Nakagawara. 2013. 'ALK is a MYCN target  
440 gene and regulates cell migration and invasion in neuroblastoma', *Sci Rep*, 3: 3450.
- 441 Helin, K., and D. Dhanak. 2013. 'Chromatin proteins and modifications as drug targets', *Nature*, 502:  
442 480-8.
- 443 Huang, Jing, Jean Dorsey, Sergei Chuikov, Xinyue Zhang, Thomas Jenuwein, Danny Reinberg, and  
444 Shelley L. Berger. 2010. 'G9a and Glp Methylate Lysine 373 in the Tumor Suppressor p53',  
445 *The Journal of Biological Chemistry*, 285: 9636-41.
- 446 Iraci, N., D. Diolaiti, A. Papa, A. Porro, E. Valli, S. Gherardi, S. Herold, M. Eilers, R. Bernardoni, G.  
447 Della Valle, and G. Perini. 2011. 'A SP1/MIZ1/MYCN repression complex recruits HDAC1  
448 at the TRKA and p75NTR promoters and affects neuroblastoma malignancy by inhibiting the  
449 cell response to NGF', *Cancer Res*, 71: 404-12.
- 450 Kaelin Jr, William G. 2005. 'The Concept of Synthetic Lethality in the Context of Anticancer  
451 Therapy', *Nature Reviews Cancer*, 5: 689.
- 452 Ke, X. X., D. Zhang, S. Zhu, Q. Xia, Z. Xiang, and H. Cui. 2014. 'Inhibition of H3K9  
453 methyltransferase G9a repressed cell proliferation and induced autophagy in neuroblastoma  
454 cells', *PLoS One*, 9: e106962.



- 455 ————. 2019. 'Correction: Inhibition of H3K9 Methyltransferase G9a Repressed Cell Proliferation  
456 and Induced Autophagy in Neuroblastoma Cells', *PLoS One*, 14: e0213135.
- 457 Kondo, Yutaka, Lanlan Shen, Seiji Suzuki, Tsuyoshi Kurokawa, Kazuo Masuko, Yasuhito Tanaka,  
458 Hideaki Kato, Yoshiki Mizuno, Masamichi Yokoe, Fuminaka Sugauchi, Noboru Hirashima,  
459 Etsuro Orito, Hiroataka Osada, Ryuzo Ueda, Yi Guo, Xinli Chen, J. Issa Jean-Pierre, and  
460 Yoshitaka Sekido. 2007. 'Alterations of DNA methylation and histone modifications  
461 contribute to gene silencing in hepatocellular carcinomas', *Hepatology Research*, 37: 974-83.
- 462 Kubicek, S., R. J. O'Sullivan, E. M. August, E. R. Hickey, Q. Zhang, M. L. Teodoro, S. Rea, K.  
463 Mechtler, J. A. Kowalski, C. A. Homon, T. A. Kelly, and T. Jenuwein. 2007. 'Reversal of  
464 H3K9me2 by a small-molecule inhibitor for the G9a histone methyltransferase', *Mol Cell*, 25:  
465 473-81.
- 466 Lee, David Y., Jeffrey P. Northrop, Min-Hao Kuo, and Michael R. Stallcup. 2006. 'HISTONE H3  
467 LYSINE 9 METHYLTRANSFERASE G9a IS A TRANSCRIPTIONAL COACTIVATOR  
468 FOR NUCLEAR RECEPTORS', *The Journal of Biological Chemistry*, 281: 8476-85.
- 469 Lee, Jason S., Yunho Kim, Jinhyuk Bhin, Hi-Jai R. Shin, Hye Jin Nam, Seung Hoon Lee, Jong-Bok  
470 Yoon, Olivier Binda, Or Gozani, Daehee Hwang, and Sung Hee Baek. 2011. 'Hypoxia-  
471 induced methylation of a pontin chromatin remodeling factor', *Proceedings of the National  
472 Academy of Sciences*, 108: 13510.
- 473 Lee, Jason S., Yunho Kim, Ik Soo Kim, Bogyou Kim, Hee June Choi, Ji Min Lee, Hi-Jai R. Shin,  
474 Jung Hwa Kim, Ji-Young Kim, Sang-Beom Seo, Ho Lee, Olivier Binda, Or Gozani, Gregg L.  
475 Semenza, Minhyung Kim, Keun Il Kim, Daehee Hwang, and Sung Hee Baek. 2010. 'Negative  
476 Regulation of Hypoxic Responses via Induced Reptin Methylation', *Molecular Cell*, 39: 71-  
477 85.
- 478 Li, Zhenghao, Hisanori Takenobu, Amallia Nuggetsiana Setyawati, Nobuhiro Akita, Masayuki  
479 Haruta, Shunpei Satoh, Yoshitaka Shinno, Koji Chikaraishi, Kyosuke Mukae, Jesmin Akter,  
480 Ryuichi P. Sugino, Atsuko Nakazawa, Akira Nakagawara, Hiroyuki Aburatani, Miki Ohira,  
481 and Takehiko Kamijo. 2018. 'EZH2 regulates neuroblastoma cell differentiation via NTRK1  
482 promoter epigenetic modifications', *Oncogene*, 37: 2714-27.
- 483 Liu, C., Y. Yu, F. Liu, X. Wei, J. A. Wrobel, H. P. Gunawardena, L. Zhou, J. Jin, and X. Chen. 2014.  
484 'A chromatin activity-based chemoproteomic approach reveals a transcriptional repressome  
485 for gene-specific silencing', *Nat Commun*, 5: 5733.
- 486 Liu, F., D. Barsyte-Lovejoy, F. Li, Y. Xiong, V. Korboukh, X. P. Huang, A. Allali-Hassani, W. P.  
487 Janzen, B. L. Roth, S. V. Frye, C. H. Arrowsmith, P. J. Brown, M. Vedadi, and J. Jin. 2013.  
488 'Discovery of an in vivo chemical probe of the lysine methyltransferases G9a and GLP', *J  
489 Med Chem*, 56: 8931-42.
- 490 Lu, Z., Y. Tian, H. R. Salwen, A. Chlenski, L. A. Godley, J. U. Raj, and Q. Yang. 2013. 'Histone-  
491 lysine methyltransferase EHMT2 is involved in proliferation, apoptosis, cell invasion, and  
492 DNA methylation of human neuroblastoma cells', *Anticancer Drugs*, 24: 484-93.
- 493 Maris, J. M., M. D. Hogarty, R. Bagatell, and S. L. Cohn. 2007. 'Neuroblastoma', *Lancet*, 369: 2106-  
494 20.
- 495 Mossë, Yalë P., Marci Laudenslager, Luca Longo, Kristina A. Cole, Andrew Wood, Edward F.  
496 Attiyeh, Michael J. Laquaglia, Rachel Sennett, Jill E. Lynch, Patrizia Perri, Geneviève  
497 Laureys, Frank Speleman, Hakon Hakonarson, Ali Torkamani, Nicholas J. Schork, Garrett M.  
498 Brodeur, Gian Paolo Tonini, Eric Rappaport, Marcella Devoto, and John M. Maris. 2008.

- 499 'Identification of ALK as the Major Familial Neuroblastoma Predisposition Gene', *Nature*,  
500 455: 930-35.
- 501 Mozzetta, C., J. Pontis, L. Fritsch, P. Robin, M. Portoso, C. Proux, R. Margueron, and S. Ait-Si-Ali.  
502 2014. 'The histone H3 lysine 9 methyltransferases G9a and GLP regulate polycomb  
503 repressive complex 2-mediated gene silencing', *Mol Cell*, 53: 277-89.
- 504 Park, Ji Hyun, Marianna Szemes, Gabriella Cunha Vieira, Zsombor Melegh, Sally Malik, Kate J.  
505 Heesom, Laura Von Wallwitz-Freitas, Alexander Greenhough, Keith W. Brown, Y. George  
506 Zheng, Daniel Catchpoole, Michael J. Deery, and Karim Malik. 2015. 'Protein arginine  
507 methyltransferase 5 is a key regulator of the MYCN oncoprotein in neuroblastoma cells',  
508 *Molecular Oncology*, 9: 617-27.
- 509 Pfister, S. X., and A. Ashworth. 2017. 'Marked for death: targeting epigenetic changes in cancer', *Nat*  
510 *Rev Drug Discov*, 16: 241-63.
- 511 Possik, E., Z. Jalali, Y. Nouet, M. Yan, M. C. Gingras, K. Schmeisser, L. Panaite, F. Dupuy, D.  
512 Kharitidi, L. Chotard, R. G. Jones, D. H. Hall, and A. Pause. 2014. 'Folliculin regulates ampk-  
513 dependent autophagy and metabolic stress survival', *PLoS Genet*, 10: e1004273.
- 514 Schonherr, C., K. Ruuth, S. Kamaraj, C. L. Wang, H. L. Yang, V. Combaret, A. Djos, T. Martinsson,  
515 J. G. Christensen, R. H. Palmer, and B. Hallberg. 2012. 'Anaplastic Lymphoma Kinase (ALK)  
516 regulates initiation of transcription of MYCN in neuroblastoma cells', *Oncogene*, 31: 5193-  
517 200.
- 518 Shinkai, Y., and M. Tachibana. 2011. 'H3K9 methyltransferase G9a and the related molecule GLP',  
519 *Genes Dev*, 25: 781-8.
- 520 Su, Zhenqiang, Hong Fang, Huixiao Hong, Leming Shi, Wenqian Zhang, Wenwei Zhang, Yanyan  
521 Zhang, Zirui Dong, Lee J. Lancashire, Marina Bessarabova, Xi Yang, Baitang Ning,  
522 Binsheng Gong, Joe Meehan, Joshua Xu, Weigong Ge, Roger Perkins, Matthias Fischer, and  
523 Weida Tong. 2014. 'An investigation of biomarkers derived from legacy microarray data for  
524 their utility in the RNA-seq era', *Genome Biology*, 15: 3273.
- 525 Szemes, M., A. Greenhough, Z. Melegh, S. Malik, A. Yuksel, D. Catchpoole, K. Gallacher, M.  
526 Kollareddy, J. H. Park, and K. Malik. 2018. 'Wnt Signalling Drives Context-Dependent  
527 Differentiation or Proliferation in Neuroblastoma', *Neoplasia*, 20: 335-50.
- 528 Tachibana, M., K. Sugimoto, T. Fukushima, and Y. Shinkai. 2001. 'Set domain-containing protein,  
529 G9a, is a novel lysine-preferring mammalian histone methyltransferase with hyperactivity and  
530 specific selectivity to lysines 9 and 27 of histone H3', *J Biol Chem*, 276: 25309-17.
- 531 Tachibana, Makoto, Kenji Sugimoto, Masami Nozaki, Jun Ueda, Tsutomu Ohta, Misao Ohki, Mikiko  
532 Fukuda, Naoki Takeda, Hiroyuki Niida, Hiroyuki Kato, and Yoichi Shinkai. 2002. 'G9a  
533 histone methyltransferase plays a dominant role in euchromatic histone H3 lysine 9  
534 methylation and is essential for early embryogenesis', *Genes & Development*, 16: 1779-91.
- 535 Tanwar, P. S., A. E. Commandeur, L. Zhang, M. M. Taketo, and J. M. Teixeira. 2012. 'The Mullerian  
536 inhibiting substance type 2 receptor suppresses tumorigenesis in testes with sustained beta-  
537 catenin signaling', *Carcinogenesis*, 33: 2351-61.
- 538 Tu, W. B., Y. J. Shiah, C. Lourenco, P. J. Mullen, D. Dingar, C. Redel, A. Tamachi, W. Ba-Alawi, A.  
539 Aman, R. Al-Awar, D. W. Cescon, B. Haibe-Kains, C. H. Arrowsmith, B. Raught, P. C.  
540 Boutros, and L. Z. Penn. 2018. 'MYC Interacts with the G9a Histone Methyltransferase to  
541 Drive Transcriptional Repression and Tumorigenesis', *Cancer Cell*, 34: 579-95 e8.

- 542 Valentijn, L. J., J. Koster, F. Haneveld, R. A. Aissa, P. van Sluis, M. E. Broekmans, J. J. Molenaar, J.  
543 van Nes, and R. Versteeg. 2012. 'Functional MYCN signature predicts outcome of  
544 neuroblastoma irrespective of MYCN amplification', *Proc Natl Acad Sci U S A*, 109: 19190-  
545 5.
- 546 Vedadi, M., D. Barsyte-Lovejoy, F. Liu, S. Rival-Gervier, A. Allali-Hassani, V. Labrie, T. J. Wigle,  
547 P. A. Dimaggio, G. A. Wasney, A. Siarheyeva, A. Dong, W. Tempel, S. C. Wang, X. Chen, I.  
548 Chau, T. J. Mangano, X. P. Huang, C. D. Simpson, S. G. Pattenden, J. L. Norris, D. B.  
549 Kireev, A. Tripathy, A. Edwards, B. L. Roth, W. P. Janzen, B. A. Garcia, A. Petronis, J. Ellis,  
550 P. J. Brown, S. V. Frye, C. H. Arrowsmith, and J. Jin. 2011. 'A chemical probe selectively  
551 inhibits G9a and GLP methyltransferase activity in cells', *Nat Chem Biol*, 7: 566-74.
- 552 Wang, C., Z. Liu, C. W. Woo, Z. Li, L. Wang, J. S. Wei, V. E. Marquez, S. E. Bates, Q. Jin, J. Khan,  
553 K. Ge, and C. J. Thiele. 2012. 'EZH2 Mediates epigenetic silencing of neuroblastoma  
554 suppressor genes CASZ1, CLU, RUNX3, and NGFR', *Cancer Res*, 72: 315-24.
- 555 Wen, Bo, Hao Wu, Yoichi Shinkai, Rafael A. Irizarry, and Andrew P. Feinberg. 2009. 'Large histone  
556 H3 lysine 9 dimethylated chromatin blocks distinguish differentiated from embryonic stem  
557 cells', *Nature Genetics*, 41: 246.
- 558 Wenners, A., F. Hartmann, A. Jochens, A. M. Roemer, I. Alkatout, W. Klapper, M. van  
559 Mackelenbergh, C. Mundhenke, W. Jonat, and M. Bauer. 2016. 'Stromal markers AKR1C1  
560 and AKR1C2 are prognostic factors in primary human breast cancer', *Int J Clin Oncol*, 21:  
561 548-56.
- 562 Westermarck, U. K., M. Wilhelm, A. Frenzel, and M. A. Henriksson. 2011. 'The MYCN oncogene  
563 and differentiation in neuroblastoma', *Seminars in Cancer Biology*, 21: 256-66.
- 564 Yan, M., M. C. Gingras, E. A. Dunlop, Y. Nouet, F. Dupuy, Z. Jalali, E. Possik, B. J. Coull, D.  
565 Kharitidi, A. B. Dydensborg, B. Faubert, M. Kamps, S. Sabourin, R. S. Preston, D. M.  
566 Davies, T. Roughead, L. Chotard, M. A. van Steensel, R. Jones, A. R. Tee, and A. Pause.  
567 2014. 'The tumor suppressor folliculin regulates AMPK-dependent metabolic transformation',  
568 *J Clin Invest*, 124: 2640-50.
- 569 Zeng, C. M., L. L. Chang, M. D. Ying, J. Cao, Q. J. He, H. Zhu, and B. Yang. 2017. 'Aldo-Keto  
570 Reductase AKR1C1-AKR1C4: Functions, Regulation, and Intervention for Anti-cancer  
571 Therapy', *Front Pharmacol*, 8: 119.
- 572 Zhang, Jie, Pengxing He, Yong Xi, Meiyu Geng, Yi Chen, and Jian Ding. 2014. 'Down-regulation of  
573 G9a triggers DNA damage response and inhibits colorectal cancer cells proliferation',  
574 *Oncotarget*, 6(5): 2917-2927.

575

576 **Figure 1. G9a mRNA and protein expression correlate with poor prognosis and MYCN**  
577 **amplification. (A)** Kaplan Meier analysis showing that high expression of G9a correlates with poor  
578 prognosis in primary NB (SEQC, GSE62564). Bonferroni-corrected p values of log rank test are  
579 shown. **(B)** Significantly higher G9a mRNA expression is observed in MNA neuroblastoma relative  
580 to non MNA. The p-values are calculated by one-way ANOVA. **(C)** Immunoblot of G9a protein  
581 expression in a panel of MYCN-amplified and non- amplified NB cell lines.  $\beta$ -Actin is used as a  
582 loading control. Representative of n=3. **(D)** Scatter dot plot of relative G9a protein is generated from  
583 semi-quantitative densitometry of blots from **(C)**. G9a protein expression is higher in MNA  
584 neuroblastoma when normalised to  $\beta$ -Actin. Significance measured by unpaired T test (\* p<0.05).

585 **Figure 2. Immunohistochemical detection of G9a and EZH2 in primary NBs. (A)** Haematoxylin  
586 and Eosin staining, G9a and EZH2 immunohistochemistry of neuroblastic tumours.  
587 (GN=ganglioneuroma, DIFF NB= differentiating neuroblastoma, PD NB=poorly differentiated NB,  
588 UD NB=undifferentiated NB, MNA=MYCN amplified). **(B)** Positive staining for G9a correlates with  
589 INPC differentiation status of neuroblastic tumours. **(C)** Immunopositivity was scored based on the  
590 proportion of positive cells (0, no staining; 1, sporadic staining of individual cells; 2, <20% of cells  
591 stained; 3, 20% to 80% of cells stained; 4, >80% of cells stained). The proportion of G9a and EZH2  
592 positive cells strongly and significantly correlated in neuroblastic tumours.

593 **Figure 3. Apoptotic cell death following G9a depletion is dependent on MYCN. (A)** Floating and  
594 adherent cells from MNA cell lines were harvested and counted by trypan blue inclusion assay  
595 following G9a depletion. The left-hand graph of each cell line shows the percentage dead cells  
596 between the G9a depleted and negative control. The right-hand graph shows the live cell count of the  
597 cells harvested, which is used as a proxy for cell growth. Significant changes are measured the  
598 asterisks (\* p<0.05, \*\*\* p<0.01, ns not significant, n=3). Error bars show the SEM. For each cell  
599 line, an immunoblot showing effective depletions, apoptosis and autophagy markers is shown below.  
600  $\beta$ -Actin is used as loading control. The blots are representative of n=3. **(B)** Live and dead cell counts  
601 and Western blots in non-MNA cell lines.

602 **Figure 4. G9a depletion leads to cell death in MYCN induced S21N cells only. (A)** Floating and  
603 adherent cells from S21N cells, with and without MYCN induction, were harvested and counted by  
604 trypan blue inclusion assay following G9a depletion as previously. **(B)** Immunoblot of G9a and  
605 apoptosis and autophagy markers.

606

607 **Figure 5. Sensitivity of neuroblastoma cell-lines to G9a inhibitors UNC0638 and UNC0642.** (A)  
608 Thirteen neuroblastoma cell lines, including six MYCN-amplified (shades of red lines), seven non-  
609 MYCN-amplified (shades of black lines), and two non-cancerous cell lines (shades of green lines)  
610 were screened by MTT based cell proliferation assay after 72 hours to determine sensitivity to G9a  
611 SMI UNC0638. 0.0  $\mu\text{M}$  was plotted as 0.1  $\mu\text{M}$ , to be able to chart on log scale. Error bars show  
612 SEM.  $n \geq 3$ . (B) MTT assay of 13 NB and two normal cell lines using G9a SMI UNC0642. (C) Bar  
613 chart of  $\text{IC}_{50}$  values for UNC0638 with all cell lines. Error bars show SEM. (D) Bar chart of  $\text{IC}_{50}$   
614 values with UNC0642. Error bars show SEM. (E) MTT assay based  $\text{IC}_{50}$  values for UNC0638 from  
615 (A) are visualized as a scatterplot between MNA and non-MNA cell lines. Error bars show the SEM.  
616 \*\*\*  $p < 0.01$ , unpaired t test. (F) - MTT assay based  $\text{IC}_{50}$  values for UNC0642 from (B) are visualized  
617 as a scatterplot between MNA and non-MNA cell lines. Error bars show the SEM. \*\*\*  $p < 0.01$ ,  
618 unpaired t test. (G) S21N cell line with and without induced MYCN were screened by MTT based  
619 cell proliferation assay after 72 hours to determine sensitivity to G9a inhibitors UNC0638. 0.0  $\mu\text{M}$   
620 was plotted as 0.1  $\mu\text{M}$  to chart on log scale. Error bars show SEM.  $N=3$ . (H) MTT assay of induced  
621 and uninduced S21N cells using UNC0642. (I) – Bar chart of S21N  $\text{IC}_{50}$  values with and without  
622 induction. Error bars show the SEM. \*\*\*  $p < 0.01$ , unpaired t test.

623 **Figure 6. UNC0638 specifically induces apoptosis in MNA neuroblastoma cell-lines.** (A) Floating  
624 and adherent cells from MNA cell lines were harvested and counted by trypan blue inclusion assay  
625 following 5-10  $\mu\text{M}$  UNC0638 treatment for 72 hours. The left-hand graph of each cell line shows the  
626 percentage dead cells, while the righthand graph shows the live cell counts, which was used as a  
627 proxy for cell growth. Significant changes are indicated by asterisks (\*\*\*  $p < 0.01$ ,  $n=3$ ). Error bars  
628 show the SEM. Western blots for each cell line show markers for cell death, autophagy markers and  
629 MYCN.  $\beta$ -Actin is used as loading control. (representative of  $n=3$ ). (B) Live and dead cell counts and  
630 Western blots of non-MNA cells after treatment with 10  $\mu\text{M}$  UNC0638 for 72 hours. (\*  $p < 0.05$ , ns not  
631 significant,  $n=3$ )

632 **Figure 7. UNC0638 leads to apoptosis of MYCN overexpressing S21N cells.** (A) Floating and  
633 adherent cells from S21N cells with and without induced MYCN were harvested and counted by  
634 trypan blue inclusion assay following 5  $\mu\text{M}$  UNC0638 treatment at 72 hours. The charts show the  
635 percentage dead and live cells between treated and control. Error bars are SEM. (\*  $p < 0.05$ , ns not

636 significant, n=3). **(B)** Western blot of induced and uninduced S21N cells treated with 5 $\mu$ M UNC0638  
637 for 72 hours.

638 **Figure 8. RNA sequencing of BIX-01294 treated LAN-1 cells identifies G9a regulated genes.** **(A)**  
639 Heatmap of differentially expressed genes (DEGs) in biological replicate treatments of LAN-1 NB  
640 cells by 3  $\mu$ M BIX-01294 for 72 hours, (p<0.005, minimum fold change 1.3). **(B)** Gene set  
641 enrichment analysis (GSEA) showing reversal of MYC/MYCN-driven transcriptomic changes. The  
642 MYCN-157 gene sets were derived from Valentijn et al. 2012. **(C)** GSEA indicating upregulation of  
643 gene sets associated with apoptosis and **(D)** repression by EZH2, HDAC1 and HDAC3. **(E)** Kaplan-  
644 Meier survival analyses showing that high expression of genes upregulated by BIX-01294 treatment  
645 in LAN-1 correlates with good prognosis in an expression data set of 498 primary NB tumours  
646 (SEQC, GSE62564), while **(F)** high expression of BIX-01294 downregulated genes correlates with  
647 poor prognosis. **(G)** Validation of DEG in MNA NB cell lines, LAN1 and Kelly, and non-MNA cells,  
648 GI-M-EN and SK-N-AS, after treatment with G9a inhibitor (5-10  $\mu$ M UNC0638 for 24 hours).

649 **Supplementary Figure 1S. Apoptosis and cell cycle analysis of Kelly cells following UNC0638**  
650 **treatment.** **(A)** Floating and adherent cells from Kelly cells G9a were harvested and counted by  
651 trypan blue inclusion assay following G9a depletion and treatment with pan caspase inhibitor QVD  
652 10 $\mu$ M for 72 hours. Error bars are SEM. (\*\*\*) p<0.01, n=3). **(B)** Immunoblot showing that G9a  
653 depletion associated apoptosis is rescuable following QVD treatment. **(C)** Cell cycle analysis of  
654 Kelly cells treated with 3 $\mu$ M UNC0638 for 72 hours. There is a significant increase in sub G1  
655 population, an increase in G1 arrest, and a significant reduction of cells in S phase (\* p<0.05, \*\*\*  
656 p<0.01, n=3).

657 **Table 1. IC<sub>50</sub> values of NB cell lines with G9a inhibitors UNC0638 and UNC0642.** Values are  
658 means  $\pm$  SEM of n $\geq$  3. MNA cell lines are coloured red.

659

660

661 **1.1 Tables**

| Cell Line              | Drug Concentration ( $\mu\text{M}$ ) |                   |
|------------------------|--------------------------------------|-------------------|
|                        | UNC0638 $\pm$ SEM                    | UNC0642 $\pm$ SEM |
| <b>Kelly</b>           | 2.2 $\pm$ 0.1                        | 4.3 $\pm$ 0.7     |
| <b>LAN-1</b>           | 5.4 $\pm$ 0.7                        | 15.4 $\pm$ 1.7    |
| <b>IMR-32</b>          | 8.1 $\pm$ 0.3                        | 14.3 $\pm$ 1.0    |
| <b>LAN-5</b>           | 10.3 $\pm$ 3.2                       | 17.6 $\pm$ 5.1    |
| <b>NGP</b>             | 10.1 $\pm$ 1.3                       | 20.2 $\pm$ 1.7    |
| <b>SK-N-BE(2)C</b>     | 13.7 $\pm$ 2.0                       | 20.1 $\pm$ 3.6    |
| <b>LAN-6</b>           | 13.1 $\pm$ 2.9                       | 21.6 $\pm$ 0.1    |
| <b>NBL-S</b>           | 13.2 $\pm$ 1.7                       | 19.4 $\pm$ 4.3    |
| <b>SH-SY5Y</b>         | 16.1 $\pm$ 0.3                       | 29.1 $\pm$ 0.7    |
| <b>SH-EP</b>           | 16.2 $\pm$ 1.0                       | 29.6 $\pm$ 0.5    |
| <b>SH-IN</b>           | 16.8 $\pm$ 2.0                       | 30.1 $\pm$ 2.6    |
| <b>SK-N-AS</b>         | 28.3 $\pm$ 3.8                       | 48.2 $\pm$ 6.0    |
| <b>GI-ME-N</b>         | 29.9 $\pm$ 1.4                       | 51.0 $\pm$ 1.4    |
| <b>S21N (MYCN ON)</b>  | 5.7 $\pm$ 0.7                        | 10.6 $\pm$ 1.5    |
| <b>S21N (MYCN OFF)</b> | 16.6 $\pm$ 2.1                       | 23.2 $\pm$ 3.8    |

662 **2 Conflict of Interest**

663 The authors declare that the research was conducted in the absence of any commercial or financial  
664 relationships that could be construed as a potential conflict of interest.

665 **3 Author Contributions**

666 JB, MS, AD and ZM carried out all experiments with assistance from MK. DC provided critical  
667 reagents. KM designed the study and wrote the manuscript, with assistance from JB & MS.

668 **4 Funding**

669 This work was supported by Cancer Research UK (A12743/A21046) (to K.M.), together  
670 with the Childrens Cancer and Leukaemia Group (CCLG), Children with Cancer UK, and  
671 the Showering Fund (NHS).

## 672 **5 Acknowledgments**

673 We wish to thank the Genomics and Flow Cytometry facilities at the University of Bristol for  
674 technical help.

## 675 **1 Data Availability Statement**

676 The datasets generated for this study can be found at  
677 <http://www.ebi.ac.uk/ena/data/view/PRJEB35417>.

678



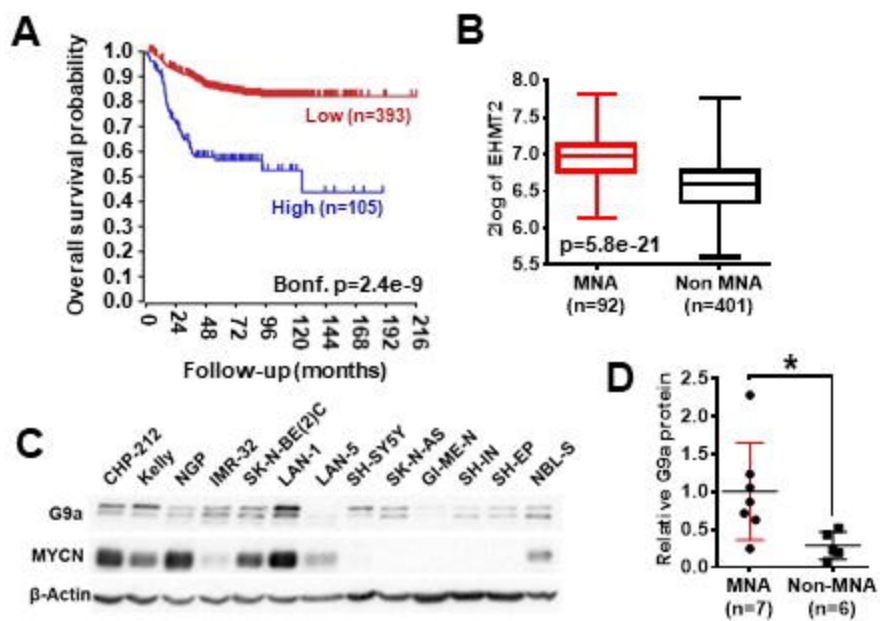

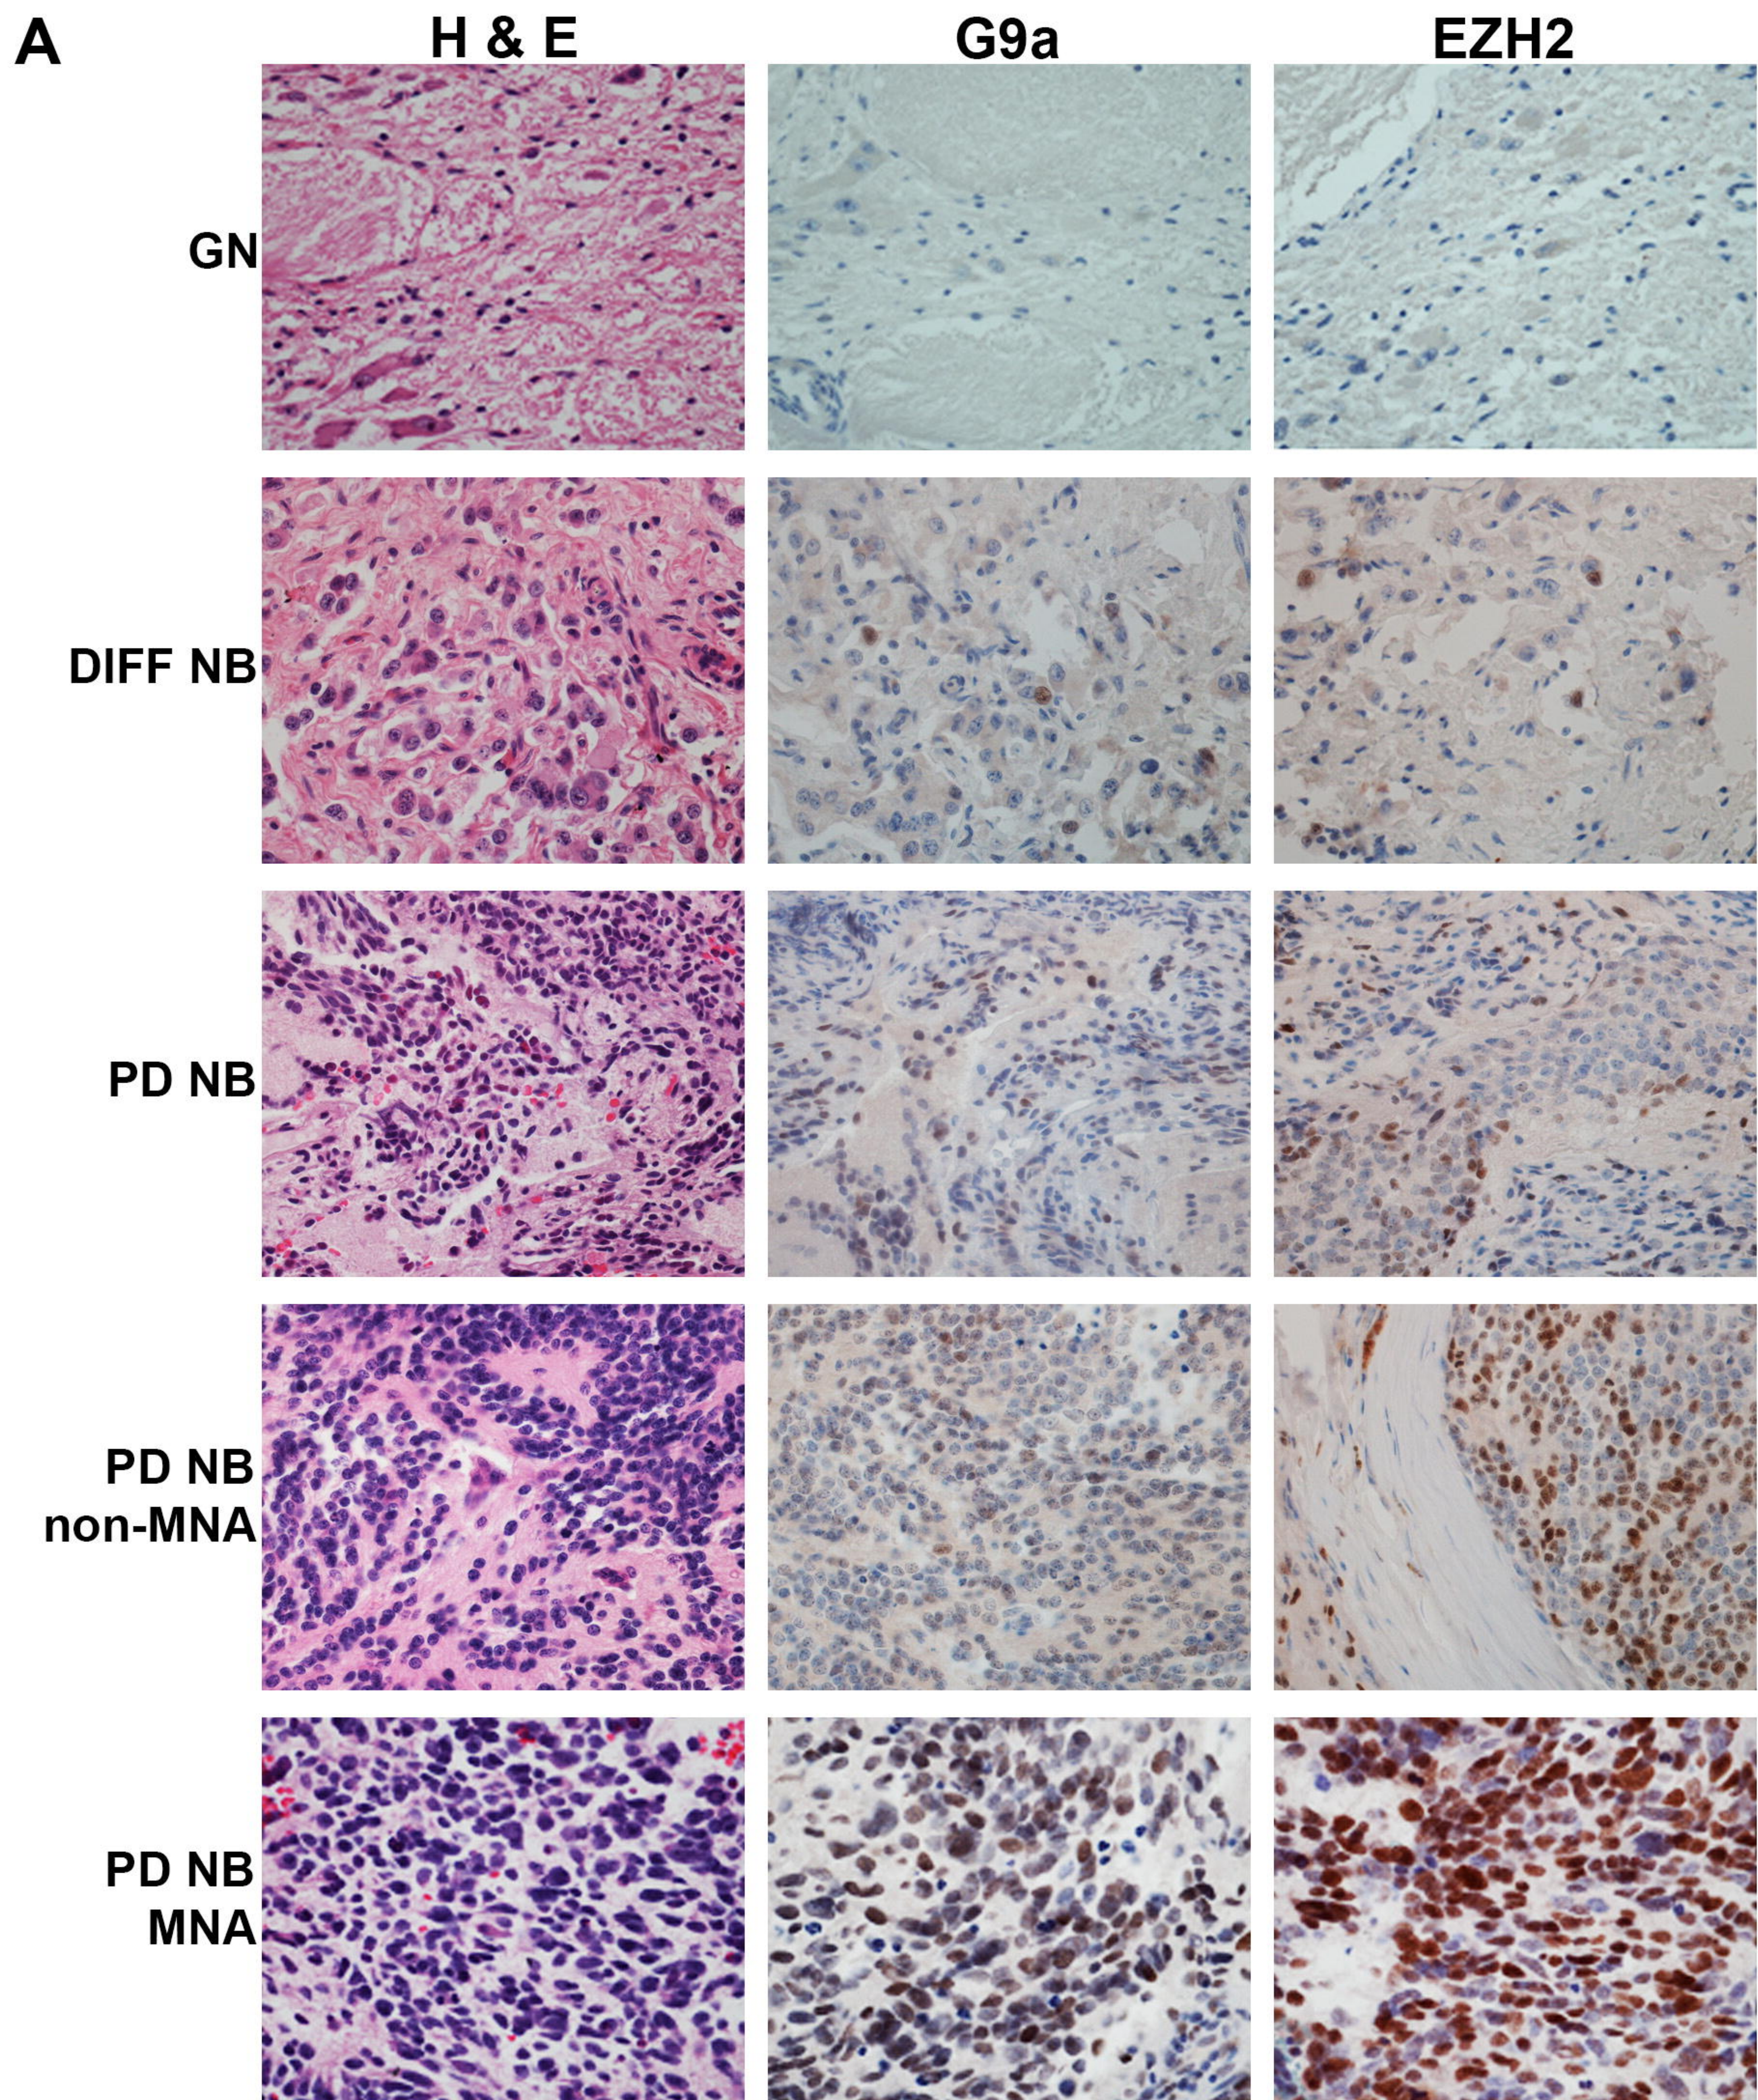

**B**  
bioRxiv preprint doi: <https://doi.org/10.1101/051100>; this version posted November 22, 2019. The copyright holder for this preprint (which was not certified by peer review) is the author/funder. All rights reserved. No reuse allowed without permission.

|                  | G9a (-) | G9a (+) |
|------------------|---------|---------|
| GN, GNB, DIFF NB | 8       | 3       |
| NB (PD, UD)      | 13      | 26      |

**Chi squared test p=0.019**

**C**

|             |   | EZH2 scoring |   |   |   |   |
|-------------|---|--------------|---|---|---|---|
|             |   | 0            | 1 | 2 | 3 | 4 |
| G9a scoring | 0 | 14           | 6 | 0 | 1 | 0 |
|             | 1 | 2            | 8 | 4 | 4 | 1 |
|             | 2 | 0            | 0 | 2 | 3 | 0 |
|             | 3 | 0            | 0 | 1 | 0 | 1 |
|             | 4 | 0            | 0 | 0 | 0 | 3 |

**Spearman rank correlation: R=0.76, p=1.45e-10**

**A**

MNA NB cell lines

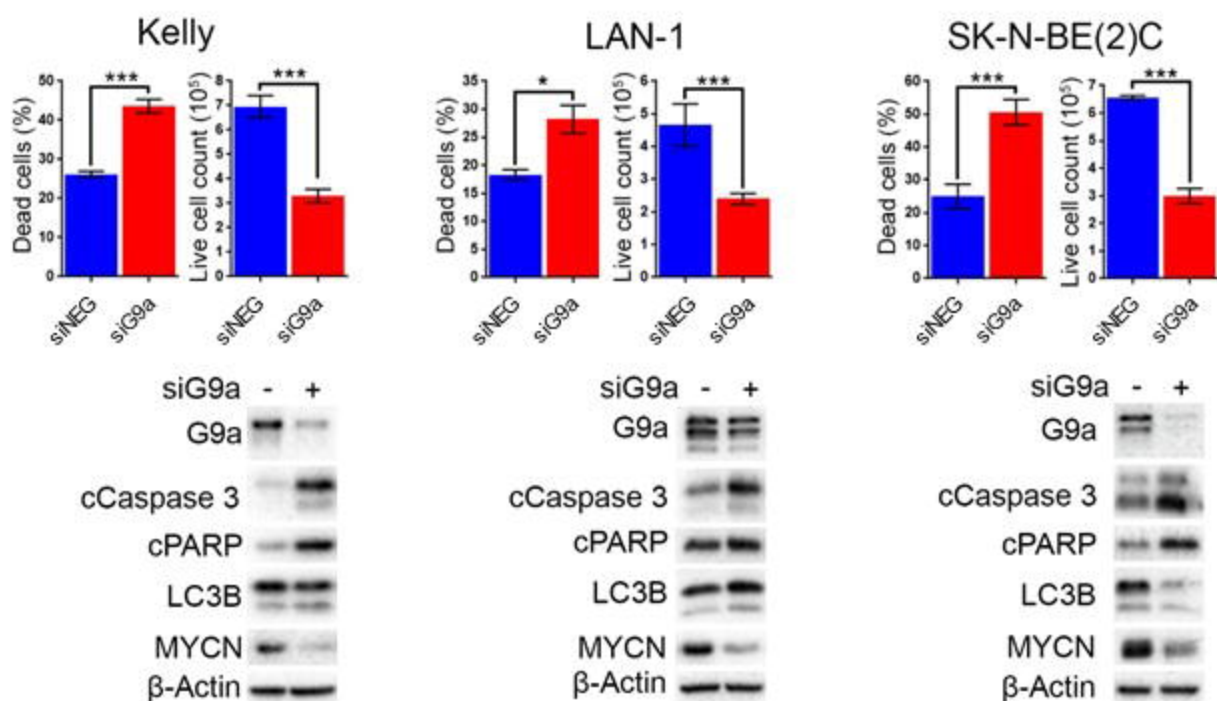

**B**

Non-MNA NB cell lines

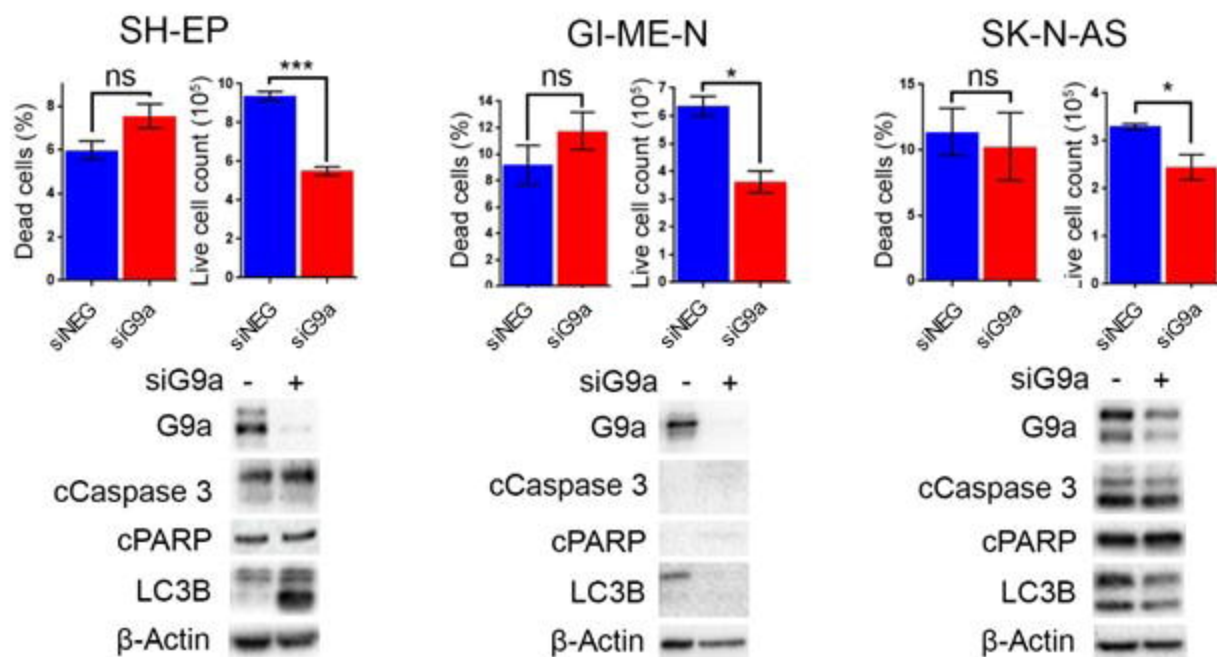

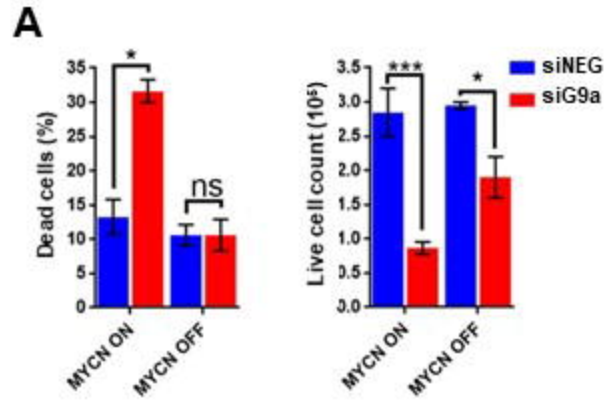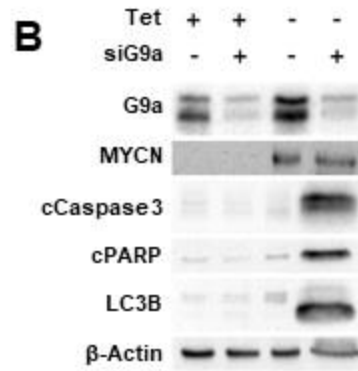

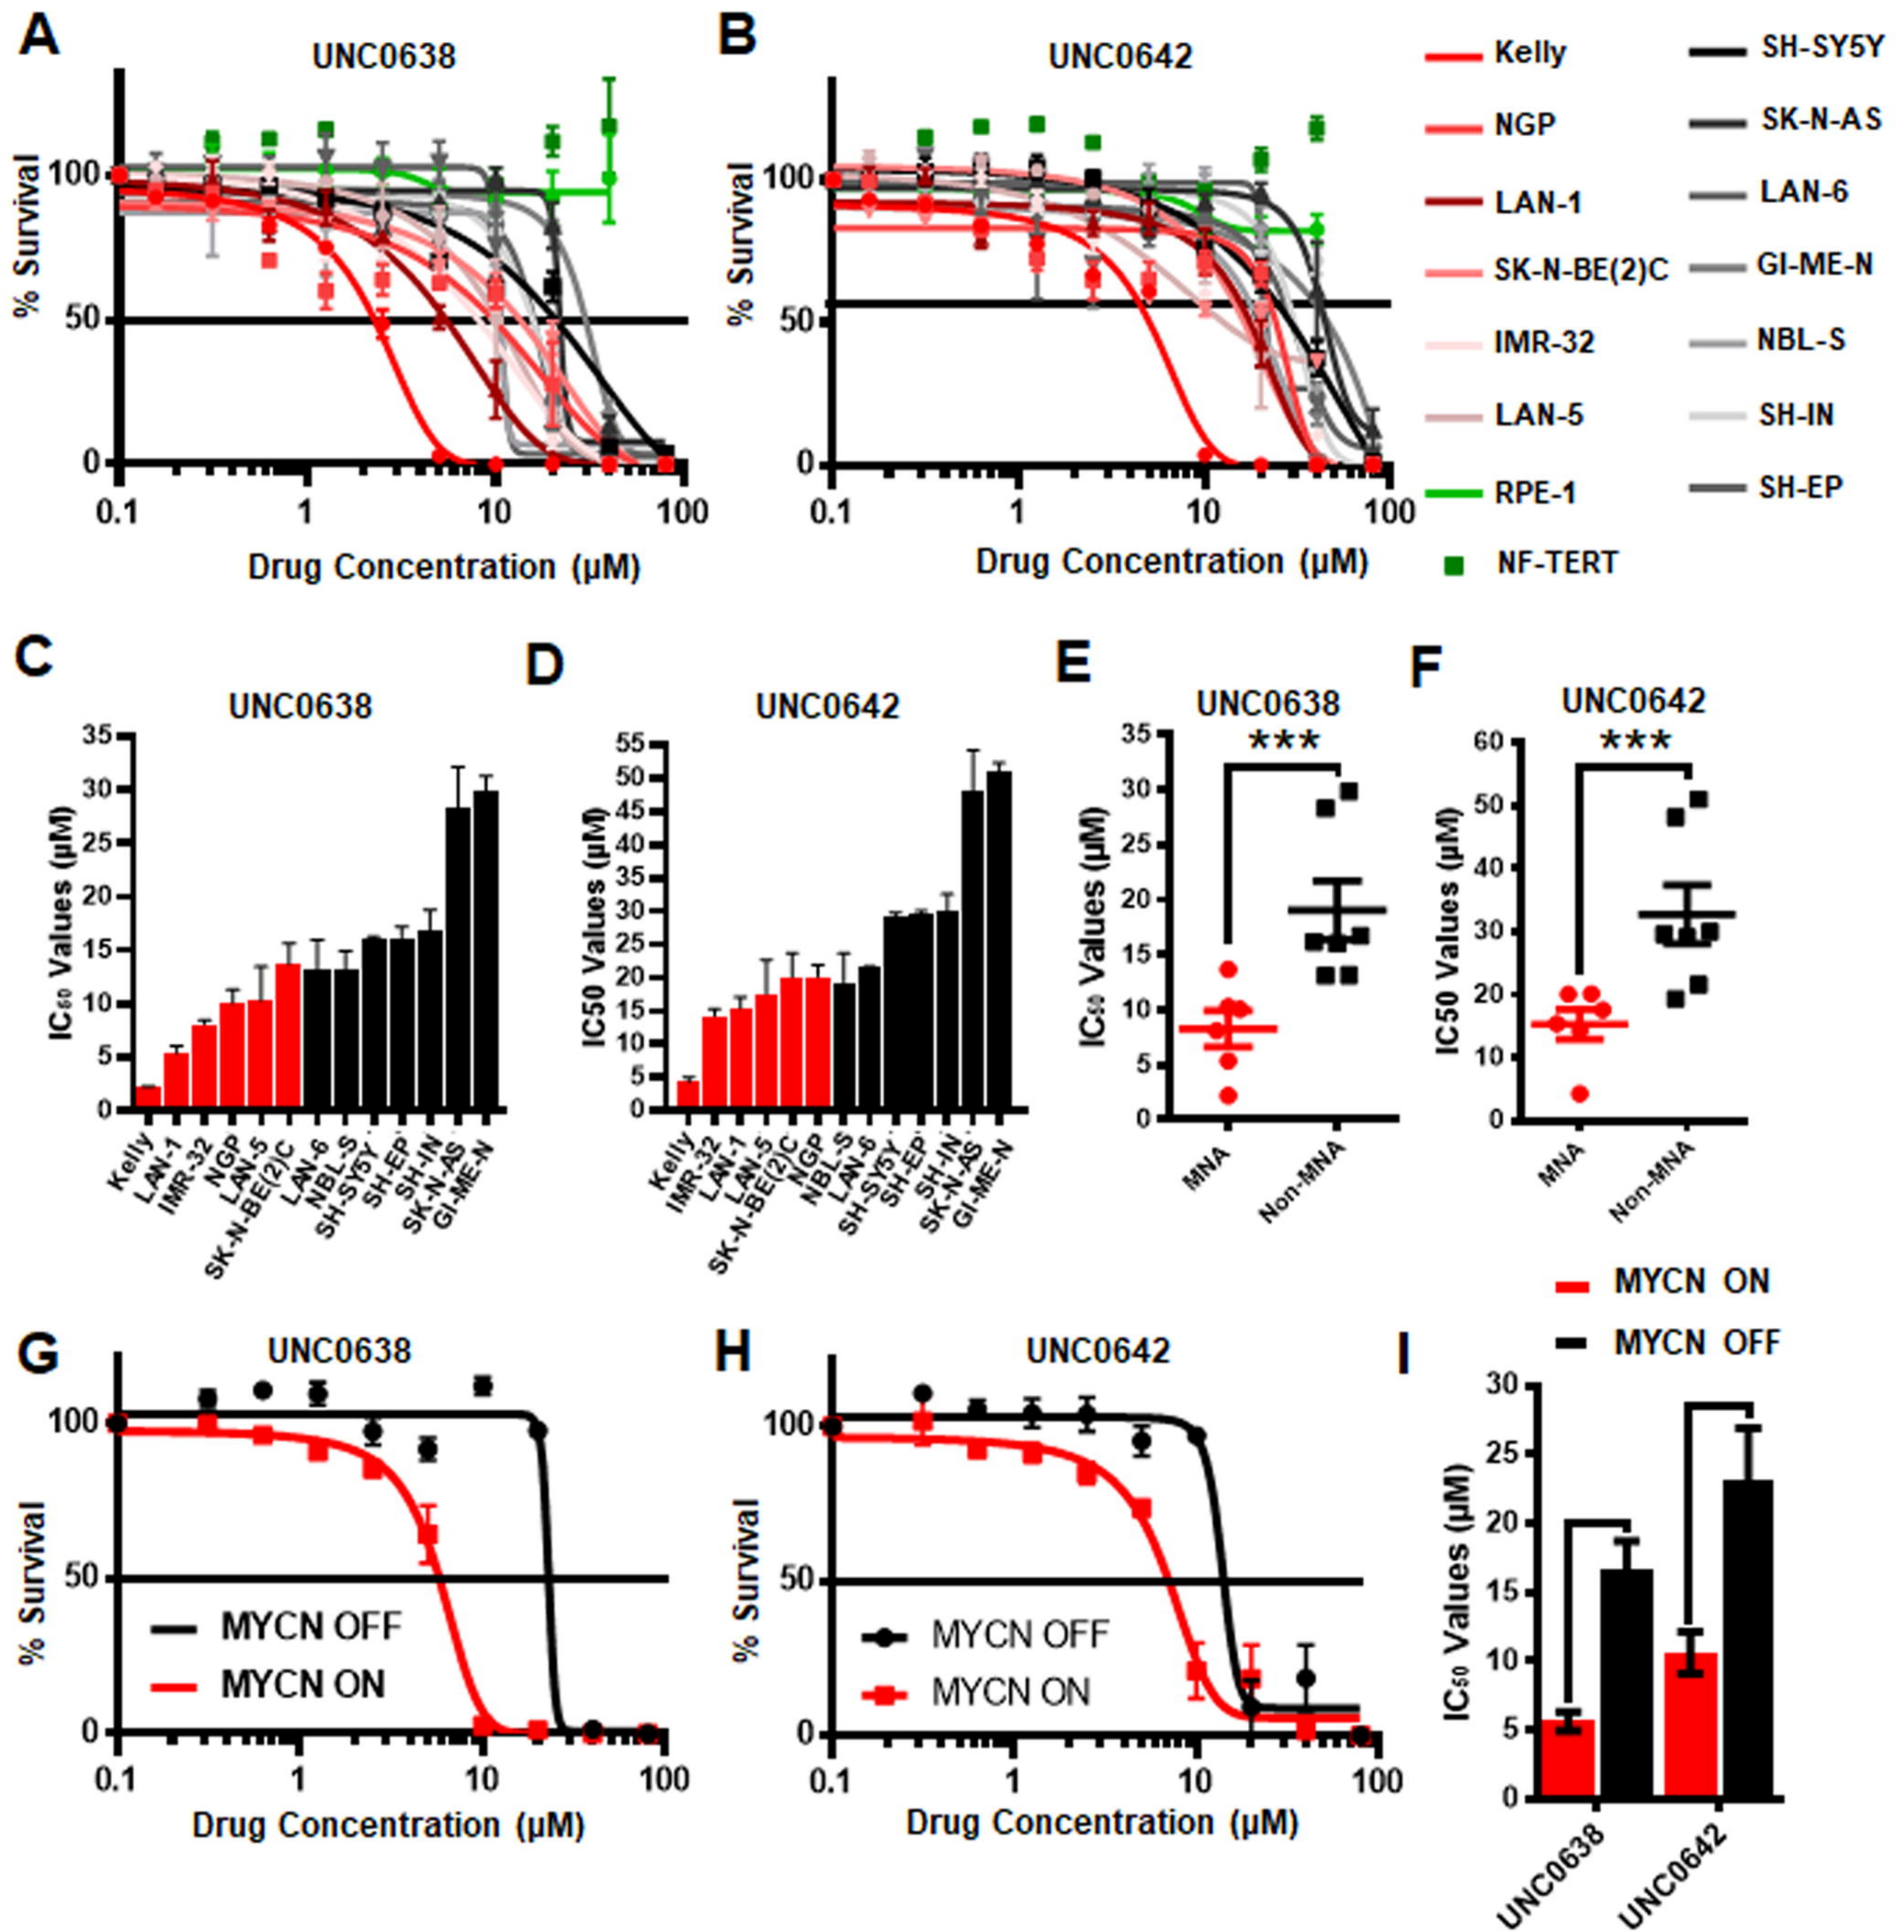

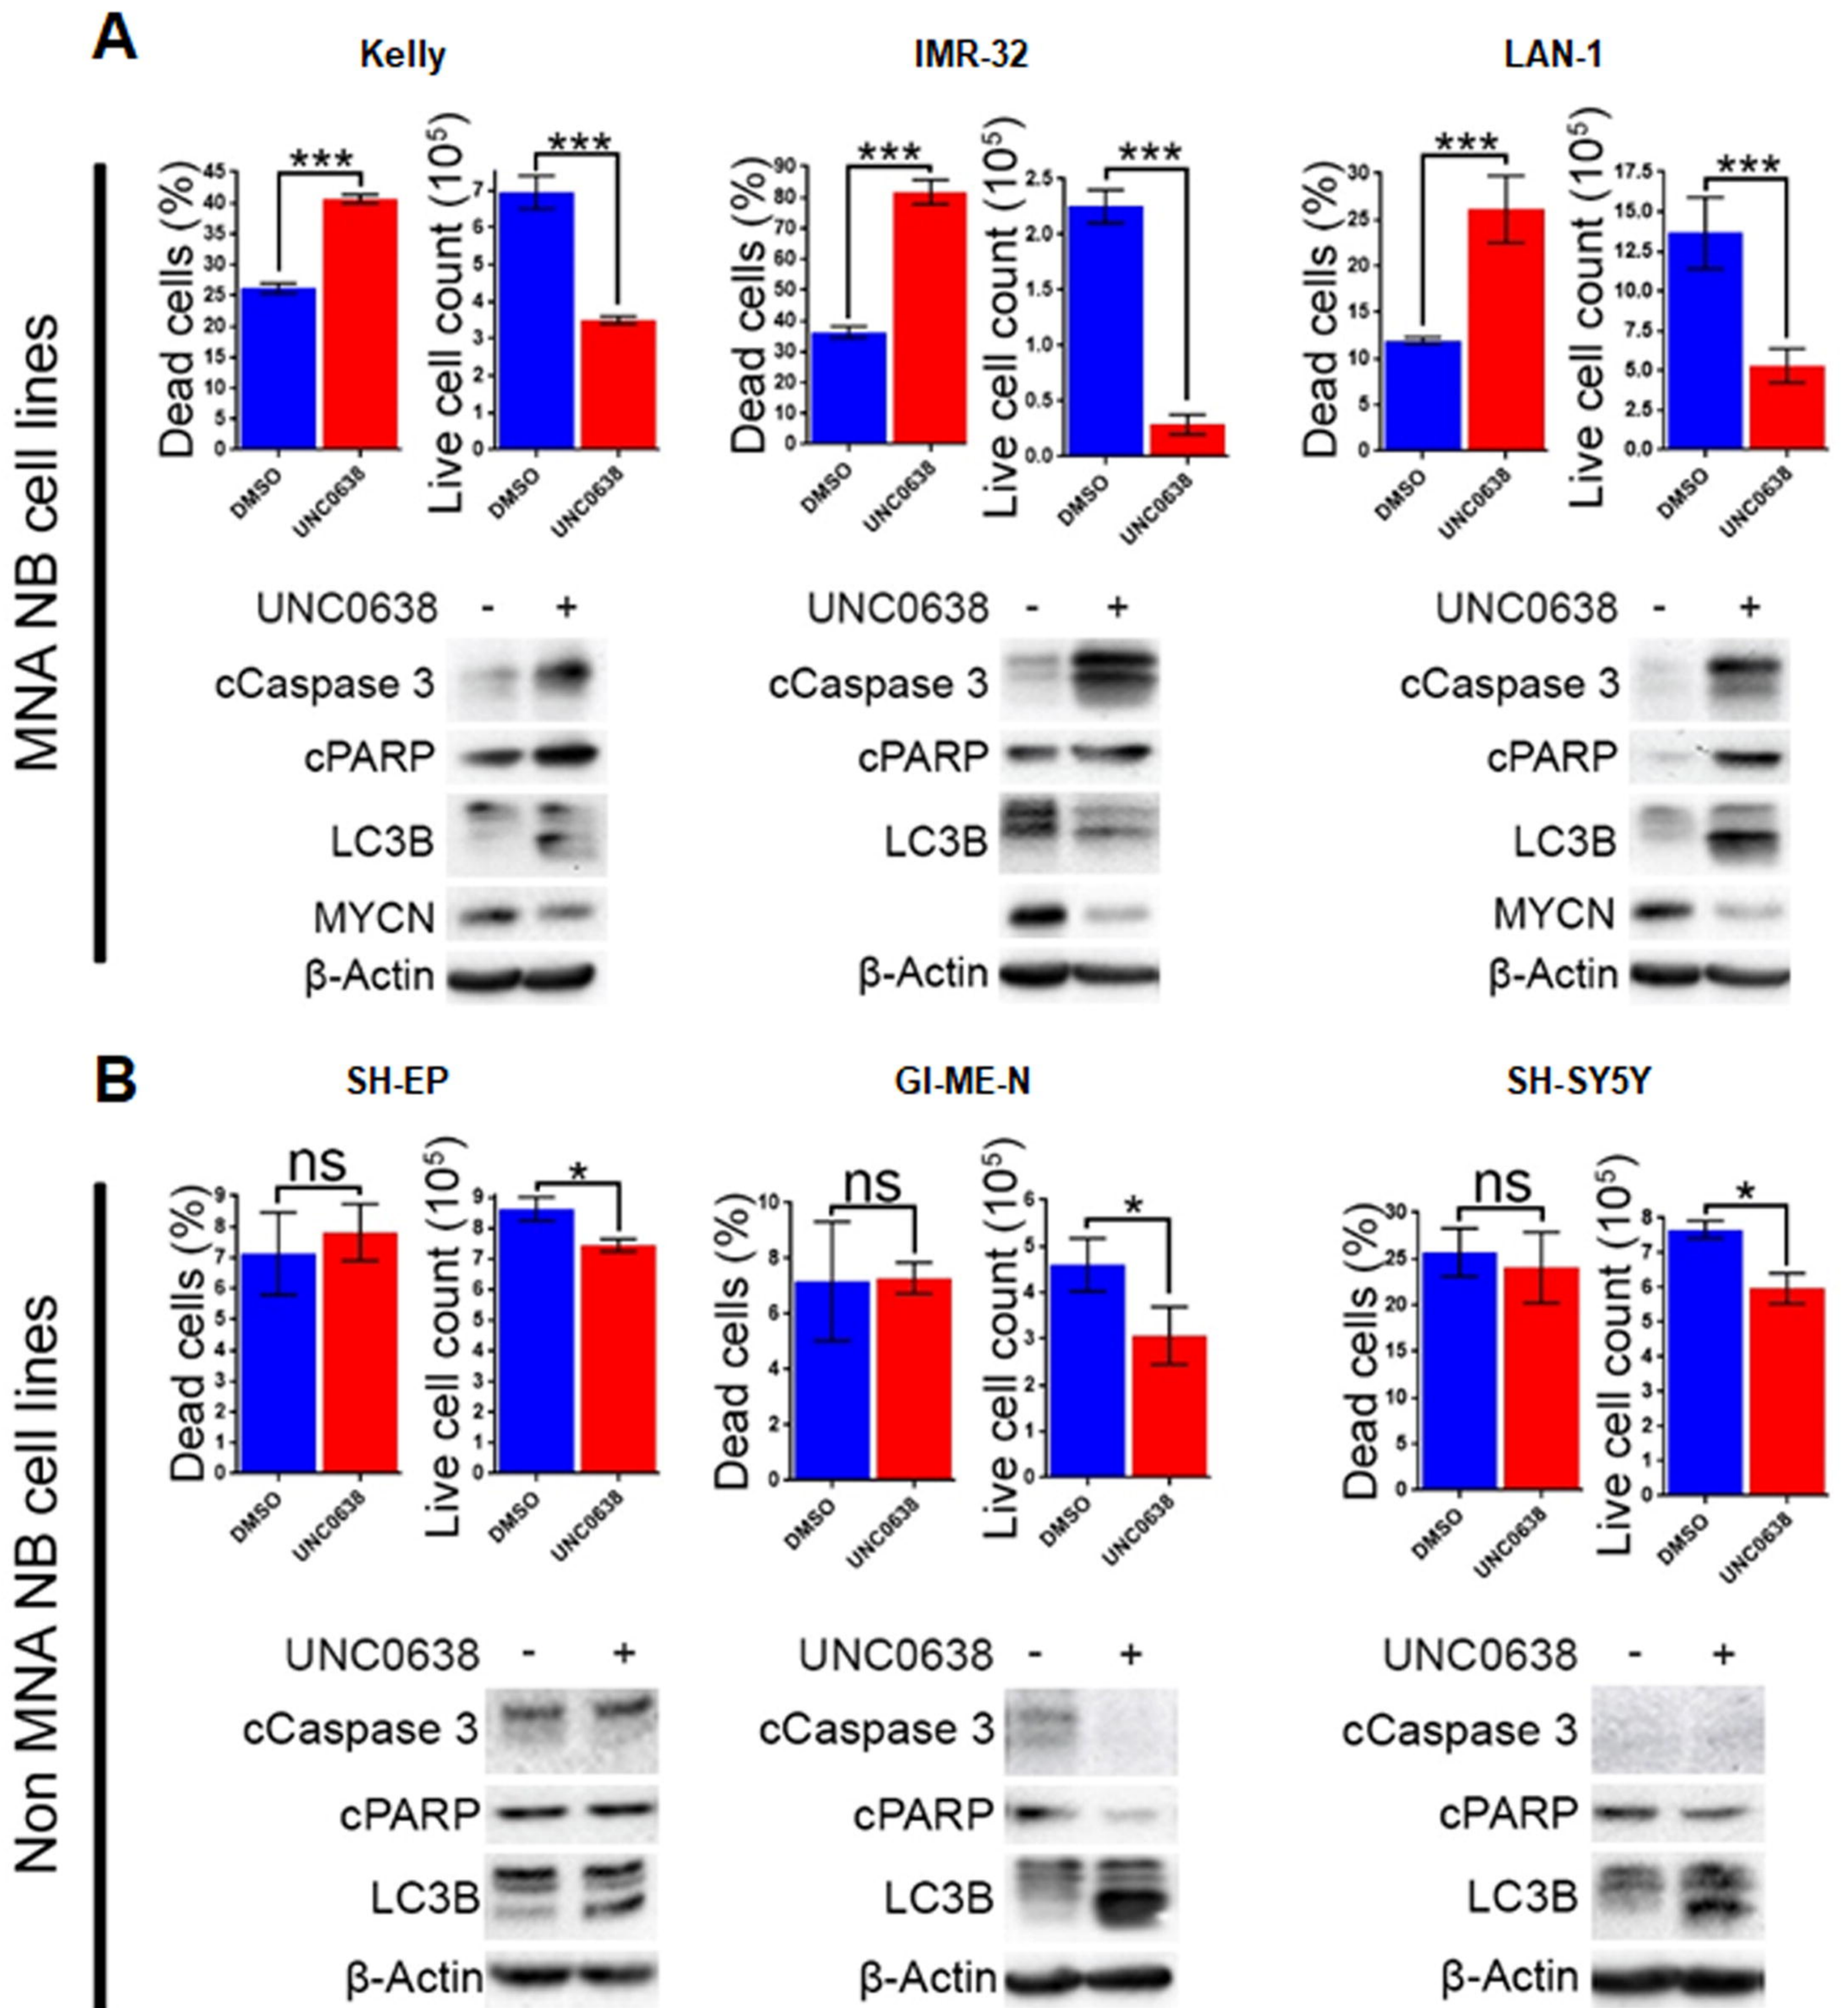

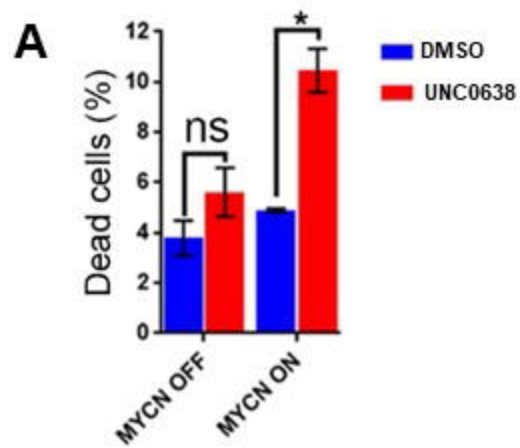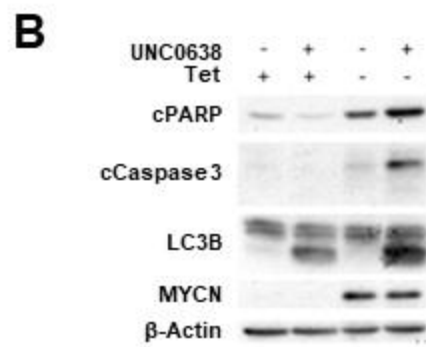

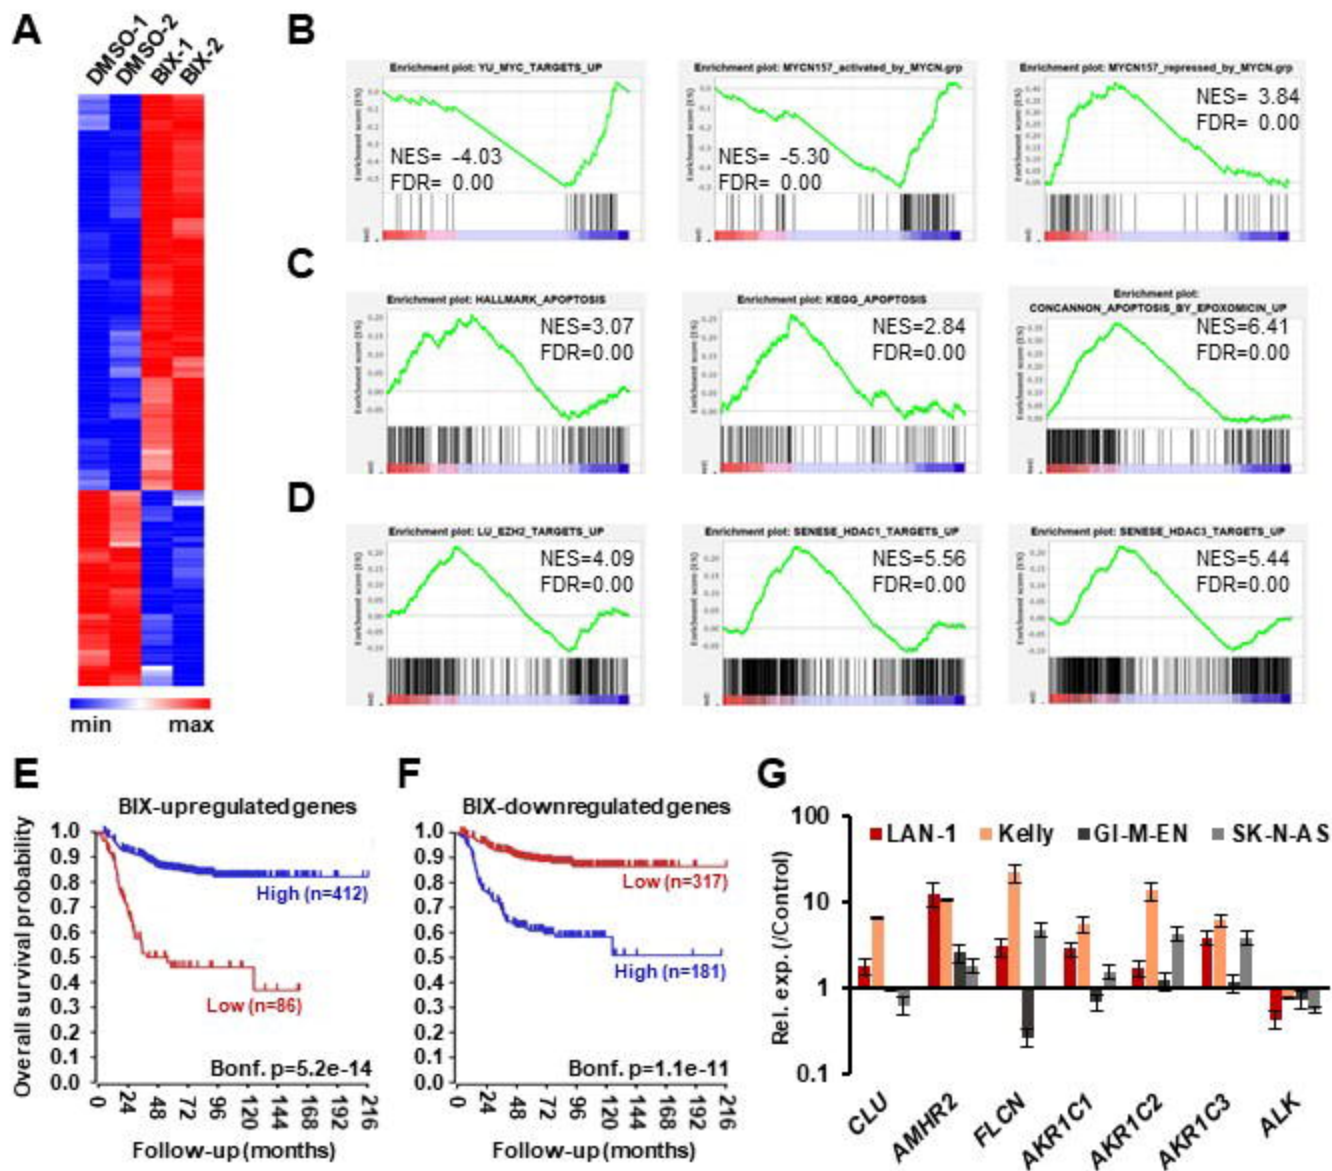

Source: http://biorxiv.org/content/10.1101/851105v1.full.pdf
